# Supplementary material for: Development of tumor-targeting aza-vesamicol derivatives with high affinity for sigma receptors for cancer theranostics
Source: Royal Society of Chemistry journal article supplement (doi:10.1039/d2md00099g), 2022-01-01
Supplement: d2md00099g1.pdf [file d2md00099g1.pdf]

**Supporting Information**

**Development of tumor-targeting aza-vesamicol derivatives with high affinity for sigma  
receptors for cancer theranostics**

Kenji Mishiro<sup>a</sup>, Mengfei Wang<sup>b</sup>, Saki Hirata<sup>b</sup>, Takeshi Fuchigami<sup>b</sup>, Kazuhiro Shiba<sup>c</sup>, Seigo Kinuya<sup>d</sup>,  
Kazuma Ogawa<sup>a,b\*</sup>

<sup>a</sup>Institute for Frontier Science Initiative, Kanazawa University, Kakuma-machi, Kanazawa, Ishikawa  
920-1192, Japan;

<sup>b</sup>Graduate School of Pharmaceutical Sciences, Kanazawa University, Kakuma-machi, Kanazawa,  
Ishikawa 920-1192, Japan;

<sup>c</sup> *Research Center for Experimental Modeling of Human Disease, Kanazawa University, Takara-  
machi, Kanazawa, Ishikawa 920-8640, Japan;*

<sup>d</sup>*Department of Nuclear Medicine, Institute of Medical, Pharmaceutical and Health Sciences,  
Kanazawa University, Takara-machi, Kanazawa, Ishikawa 920-8641, Japan*

**\*Corresponding Author:**

Kazuma Ogawa Telephone: 81-76-234-4460; Fax: 81-76-234-4460

E-mail: [kogawa@p.kanazawa-u.ac.jp](mailto:kogawa@p.kanazawa-u.ac.jp)

## Table of Contents

|                                       |         |
|---------------------------------------|---------|
| 1. NMR spectra .....                  | S3-S19  |
| 2. HPLC analyses .....                | S20     |
| 3. Detailed biodistribution data..... | S21-S25 |

# 1. NMR spectra

$^1\text{H}$  NMR Spectrum of **3** (600 MHz,  $\text{CDCl}_3$ )

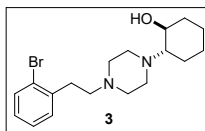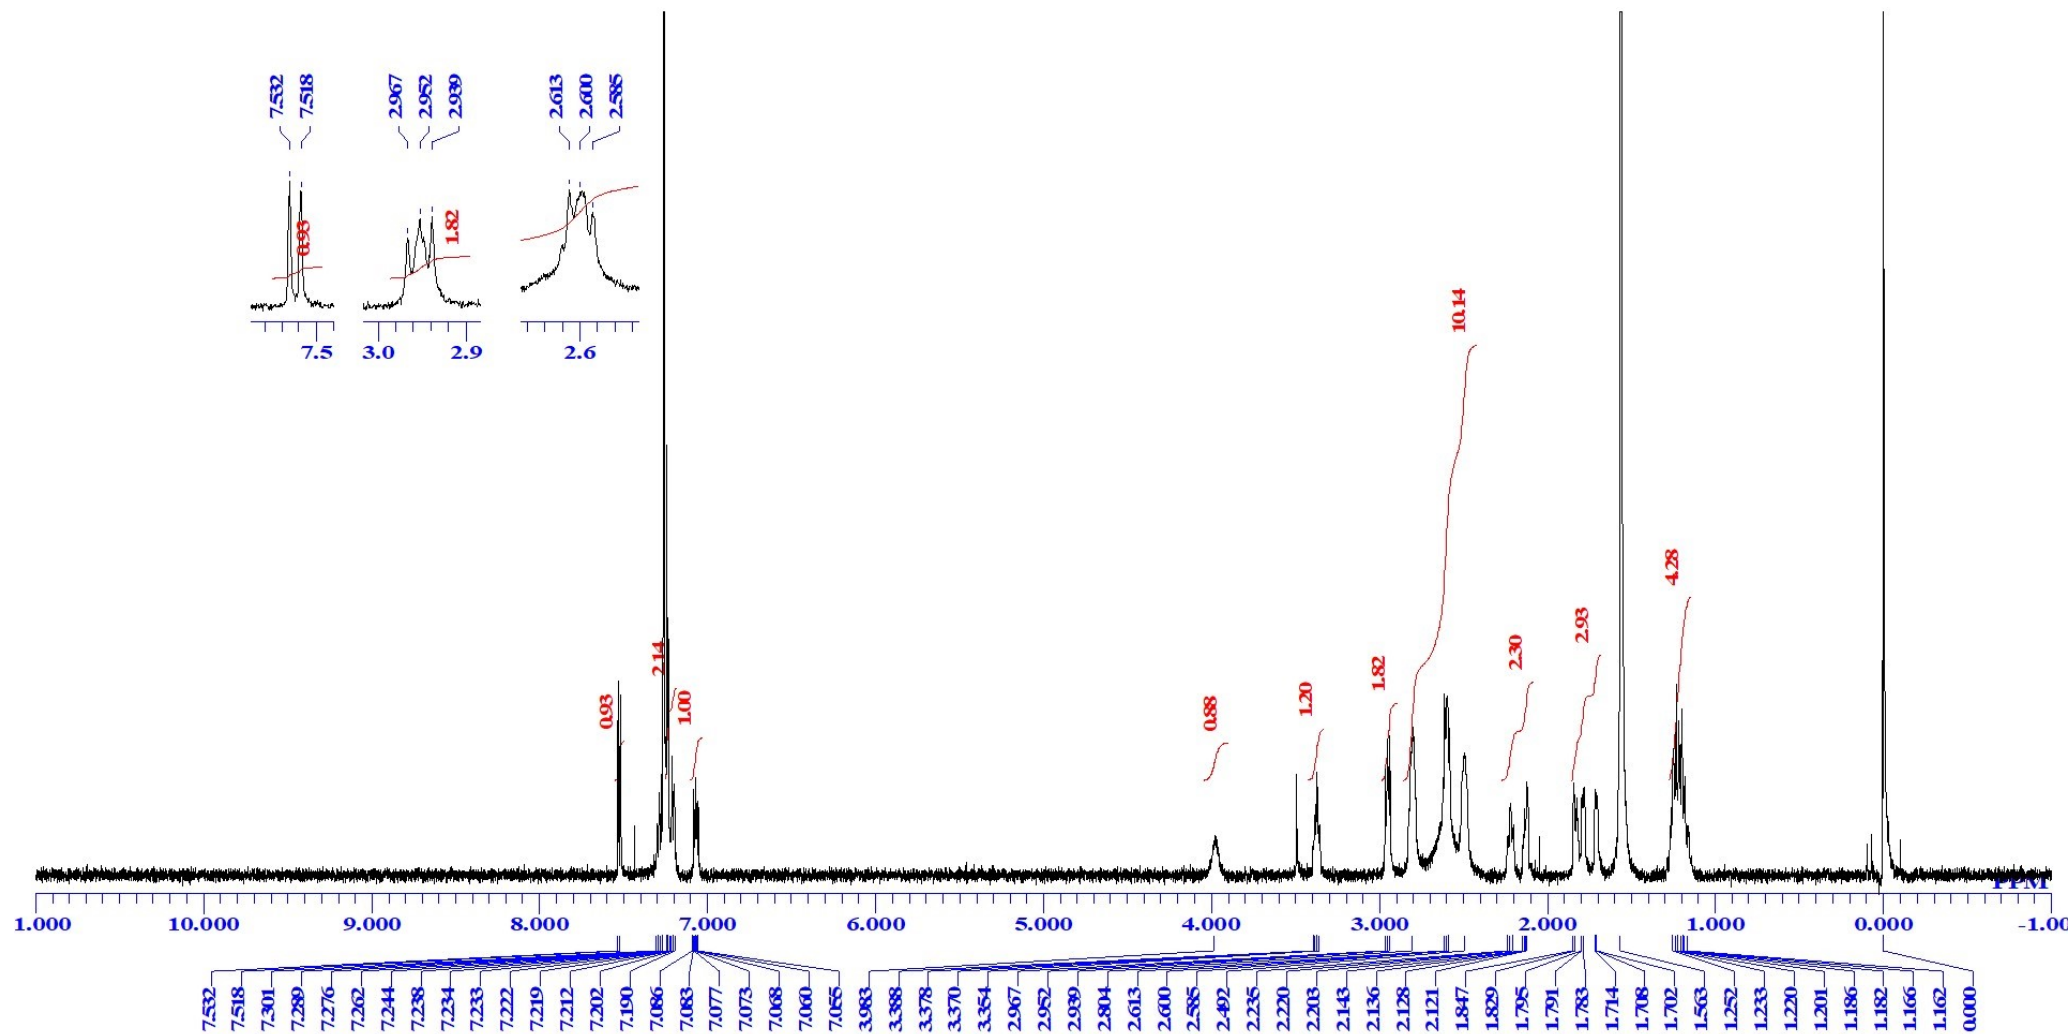

<sup>1</sup>H NMR Spectrum of 4 (400 MHz, CDCl<sub>3</sub>)

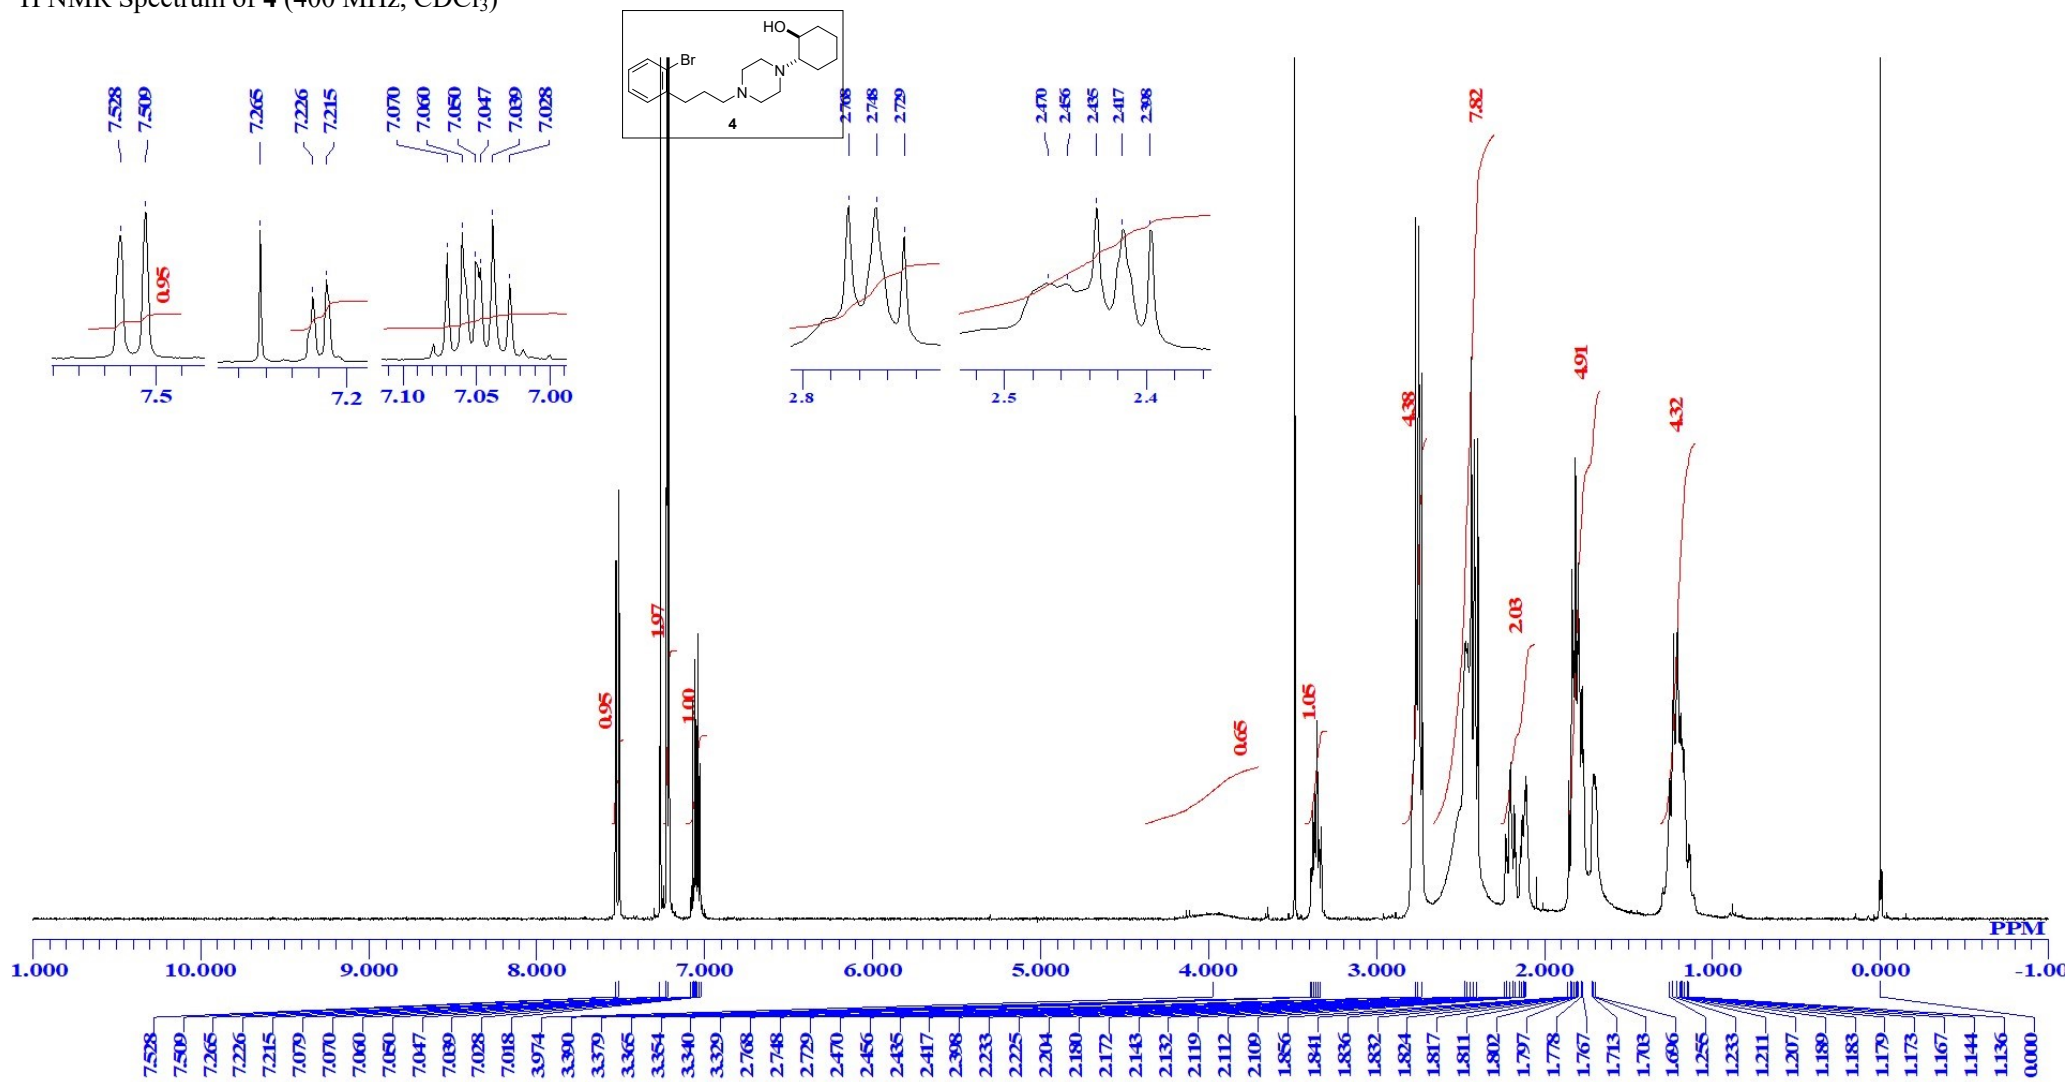

<sup>1</sup>H NMR Spectrum of **5** (400 MHz, CDCl<sub>3</sub>)

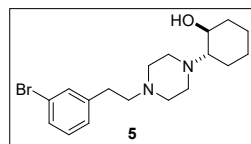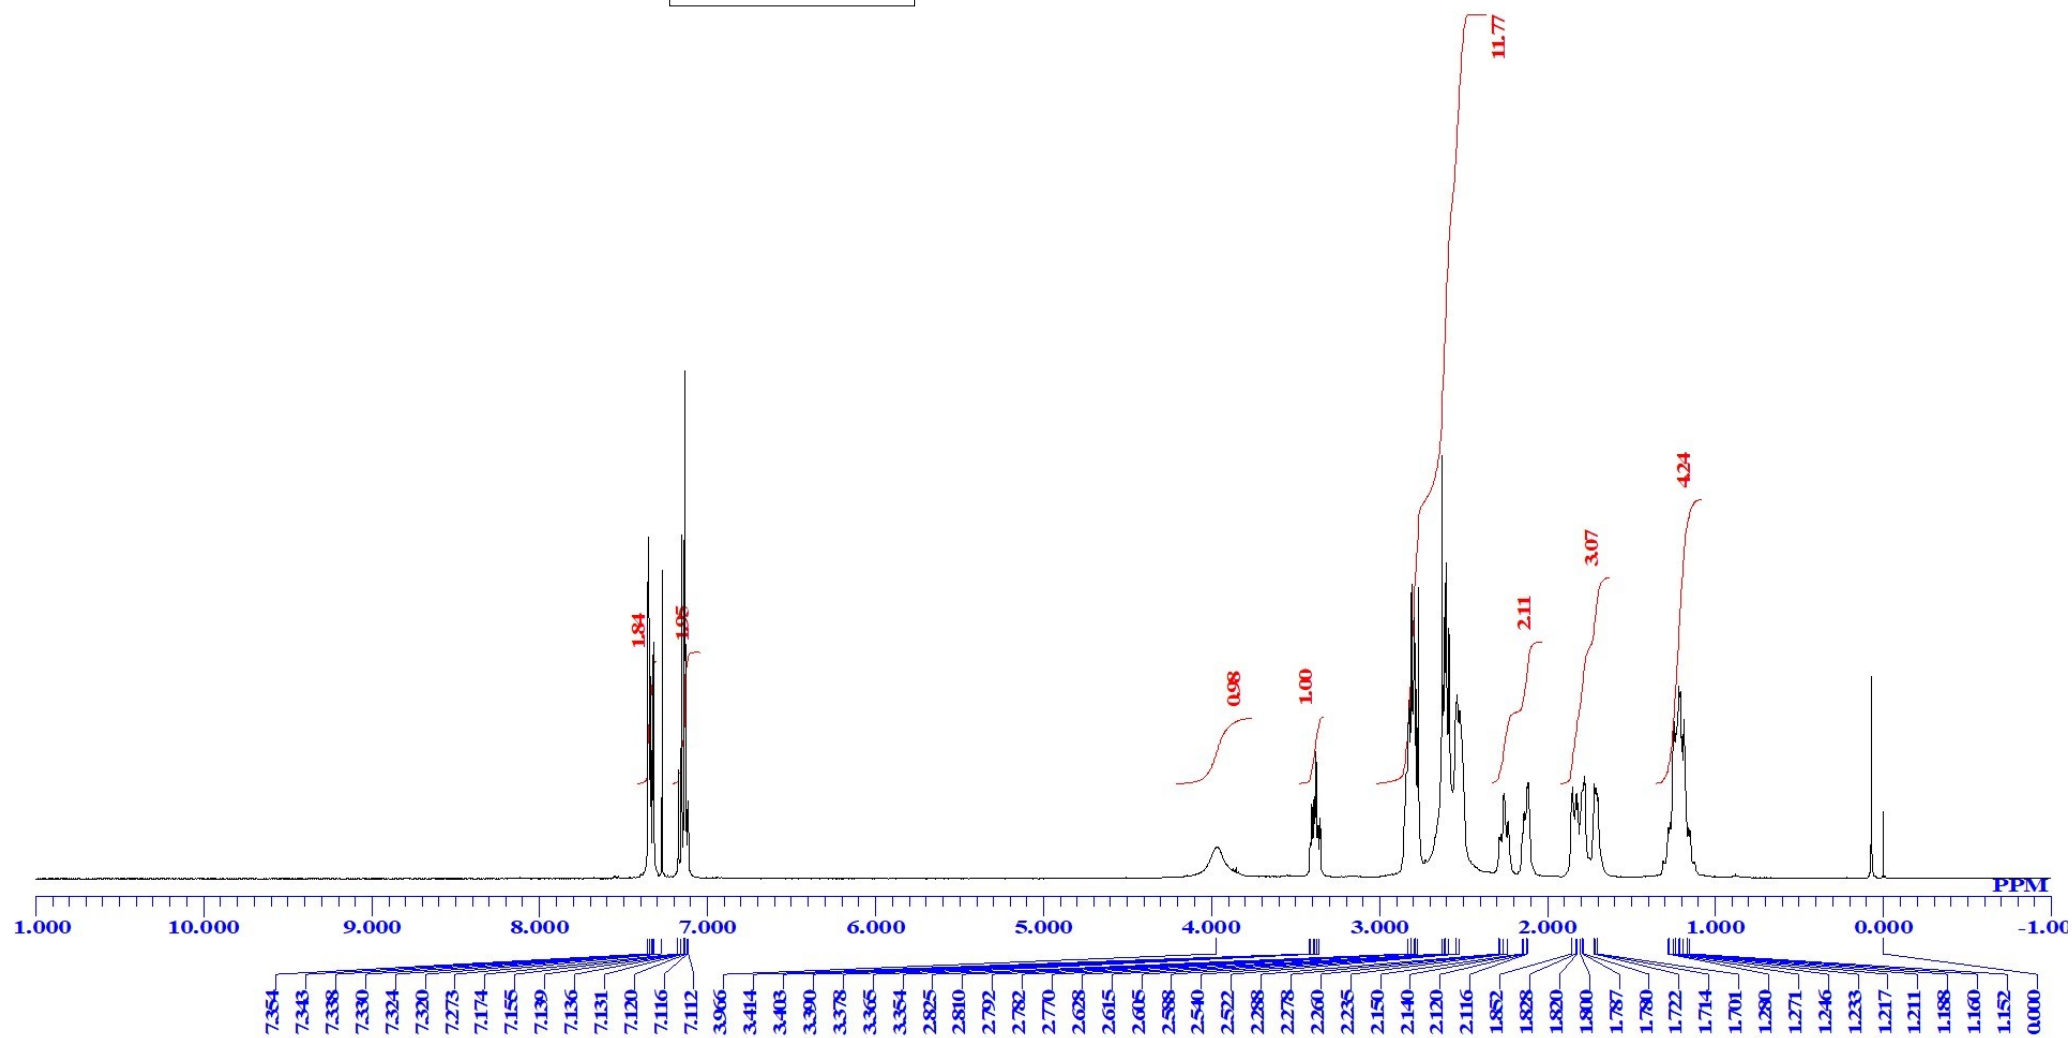

<sup>1</sup>H NMR Spectrum of **6** (400 MHz, CDCl<sub>3</sub>)

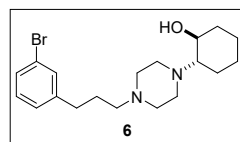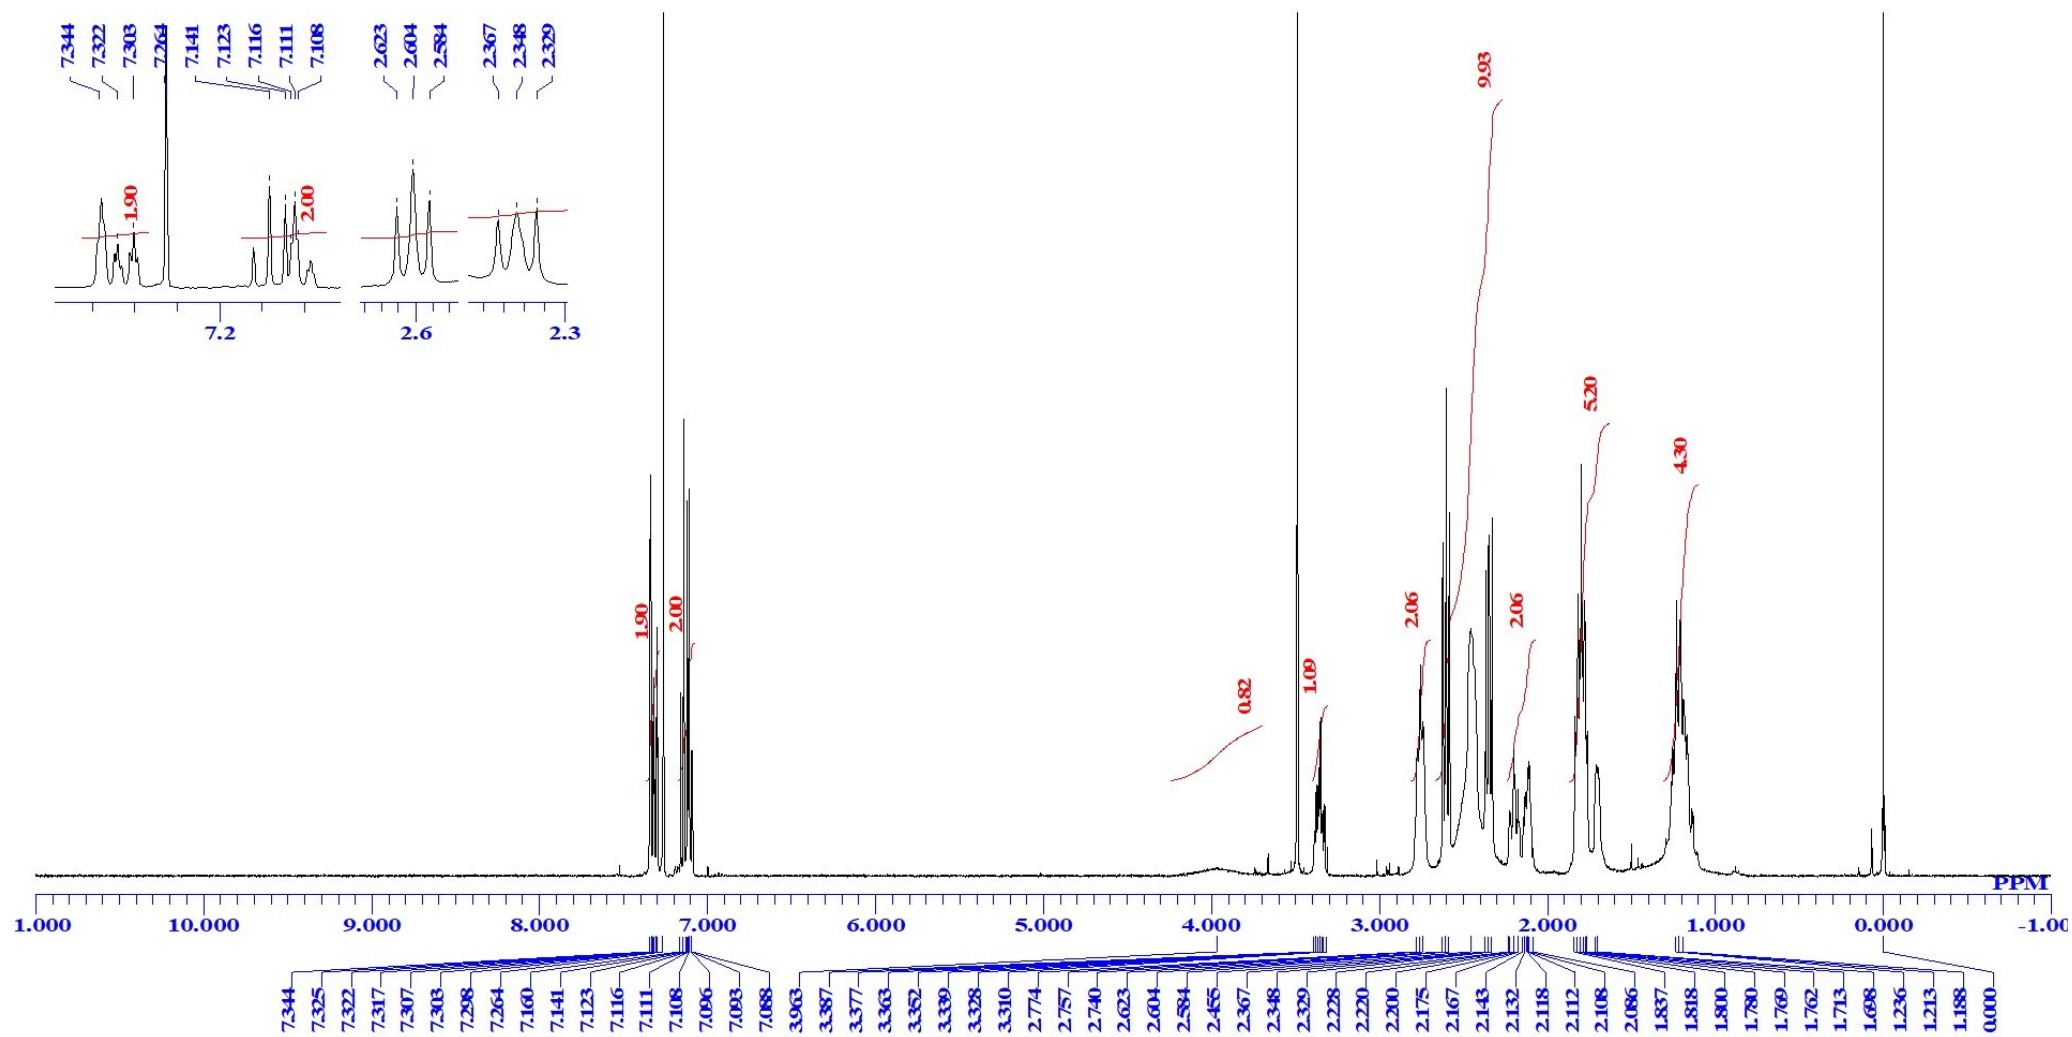

$^1\text{H}$  NMR Spectrum of 7 (400 MHz,  $\text{CDCl}_3$ )

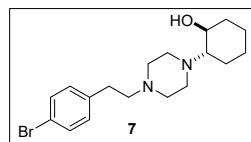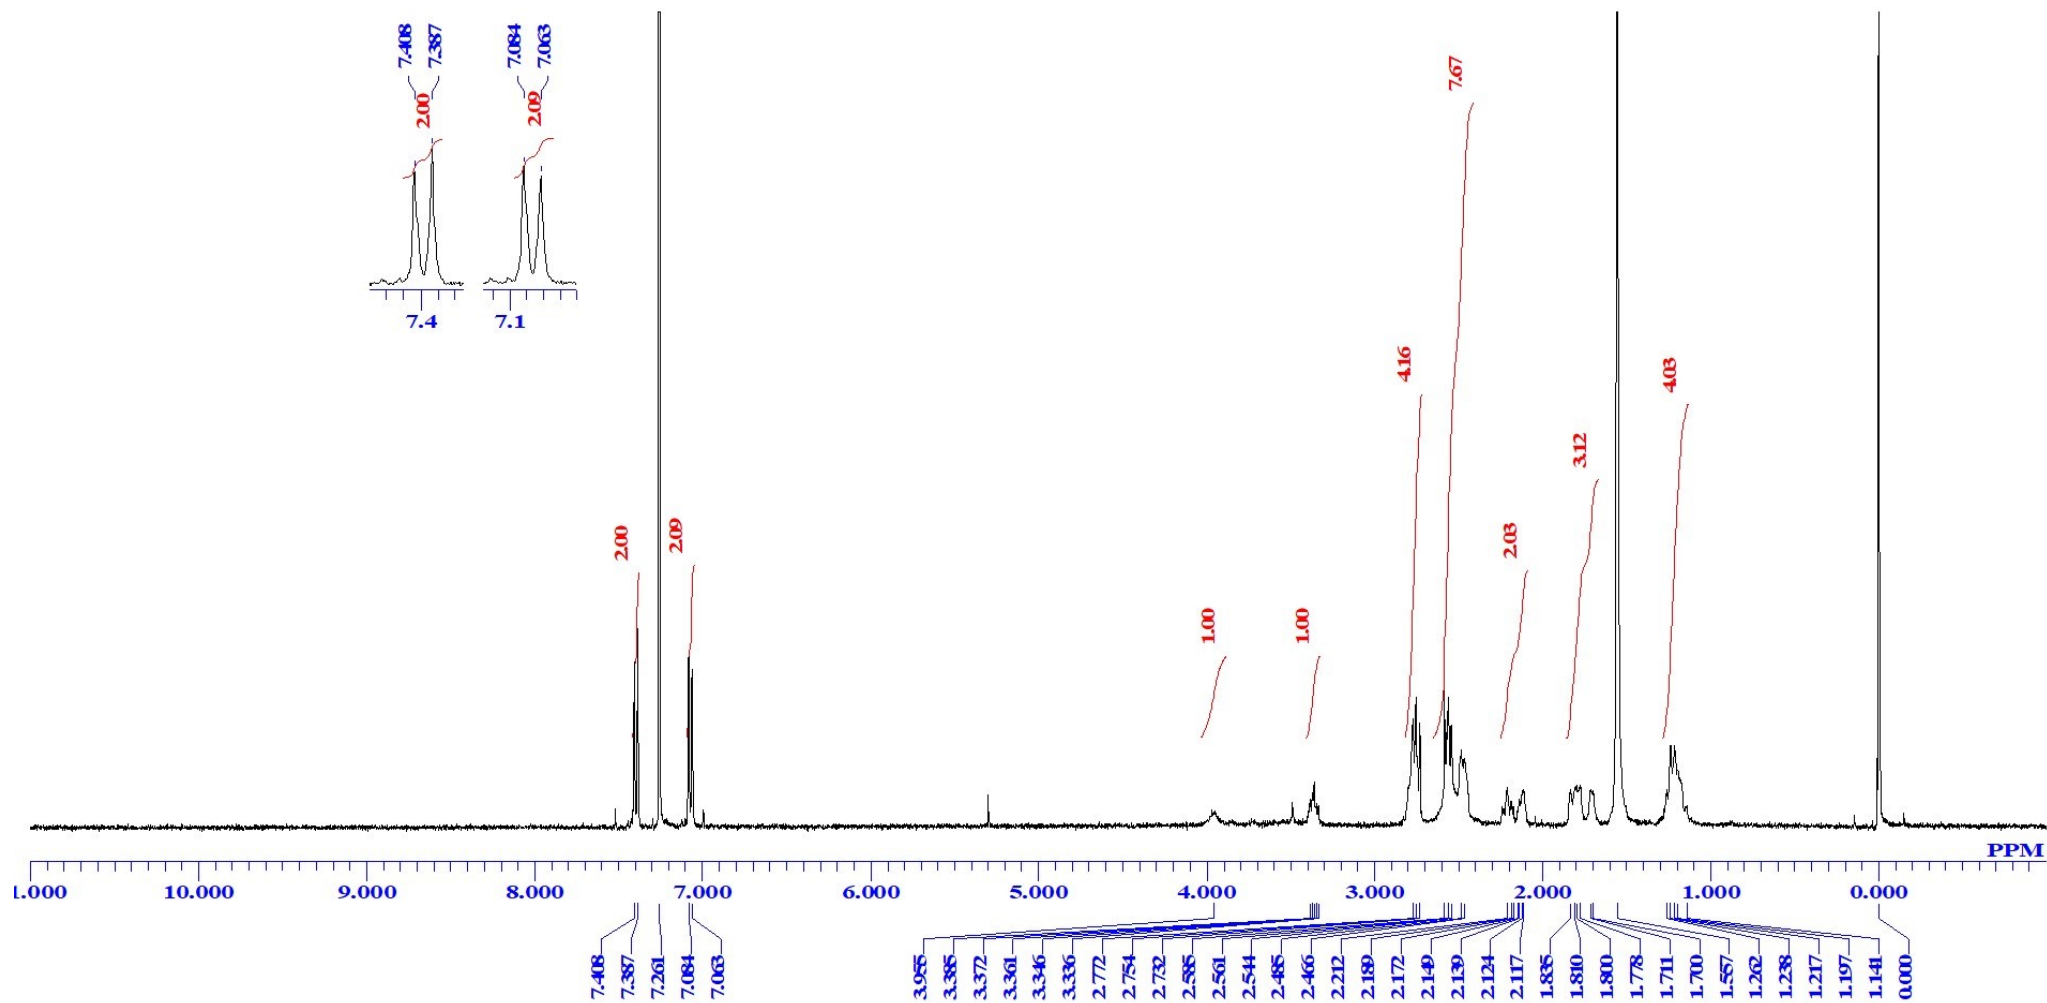

$^1\text{H}$  NMR Spectrum of **9** (400 MHz,  $\text{CDCl}_3$ )

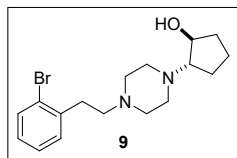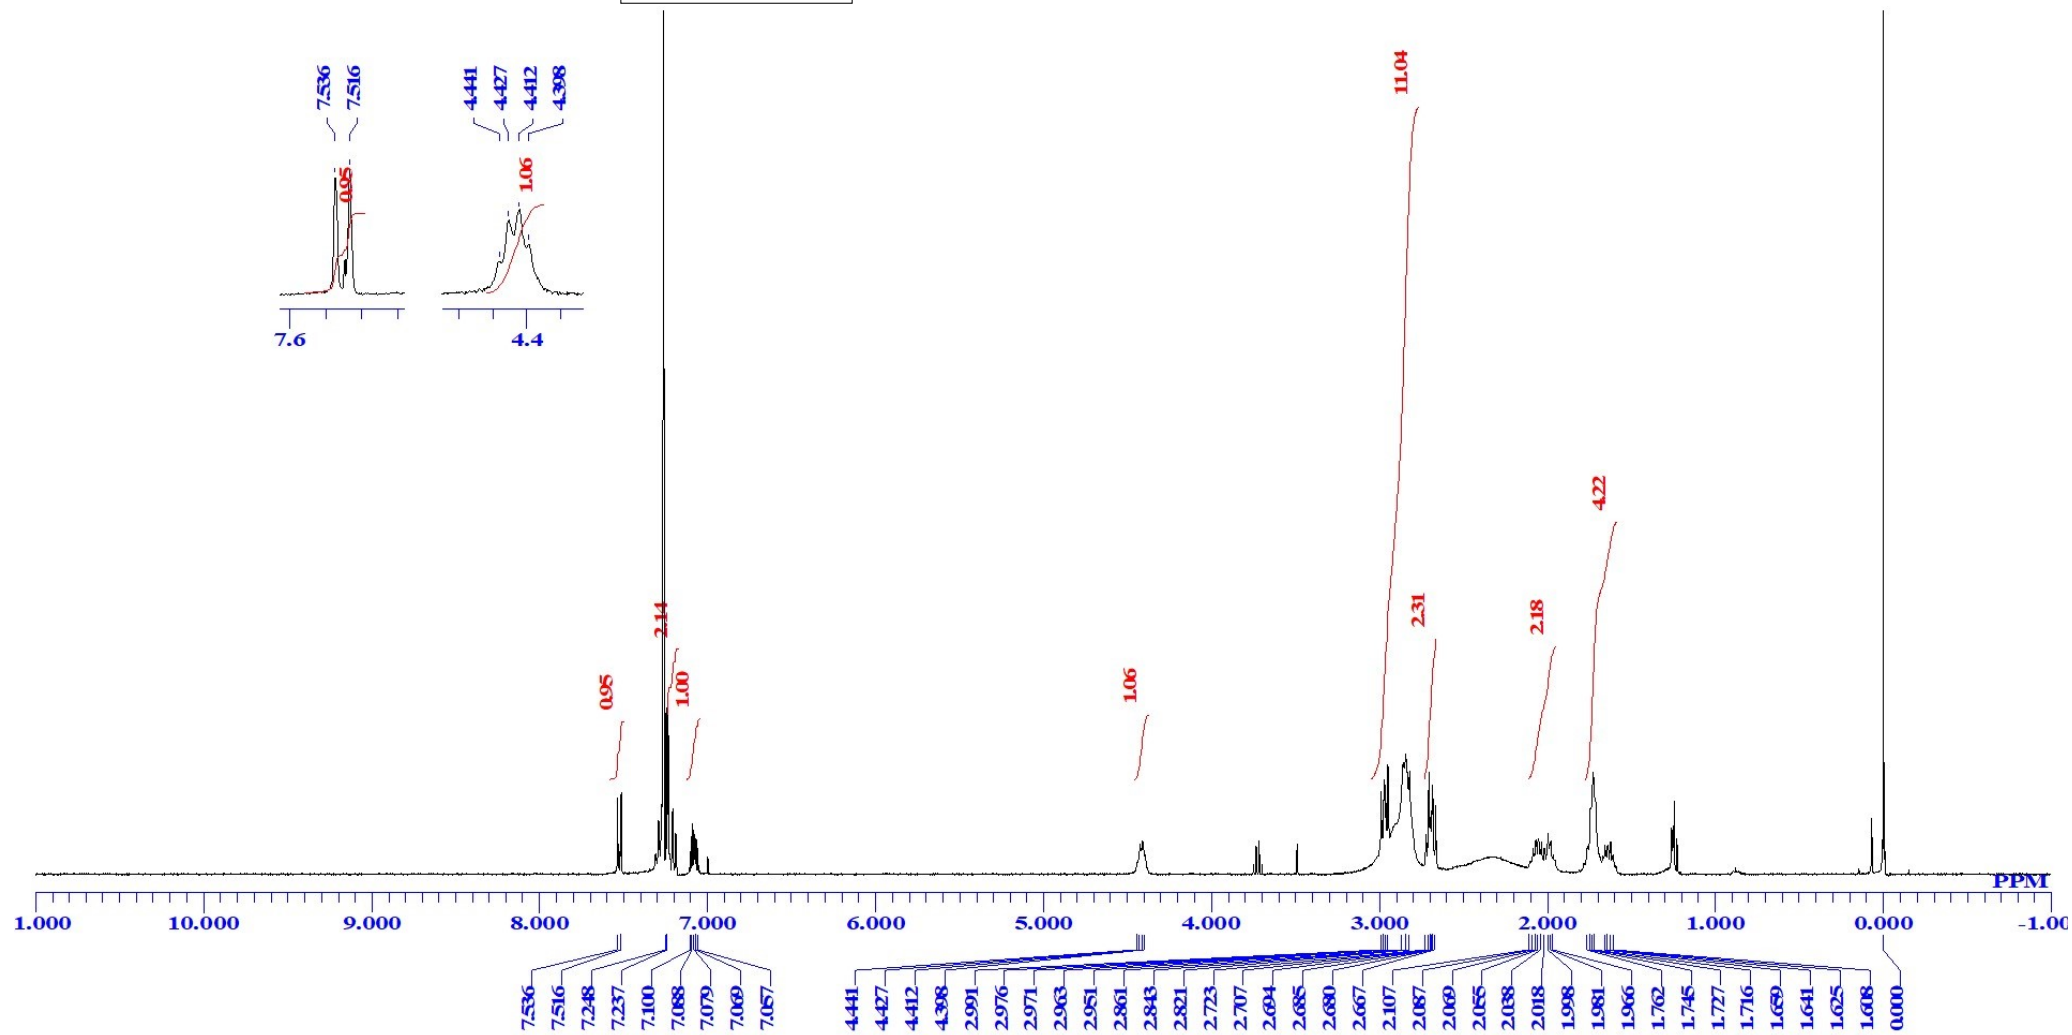



<sup>1</sup>H NMR Spectrum of **10** (400 MHz, CDCl<sub>3</sub>)

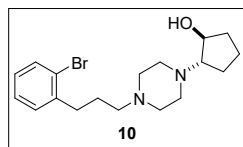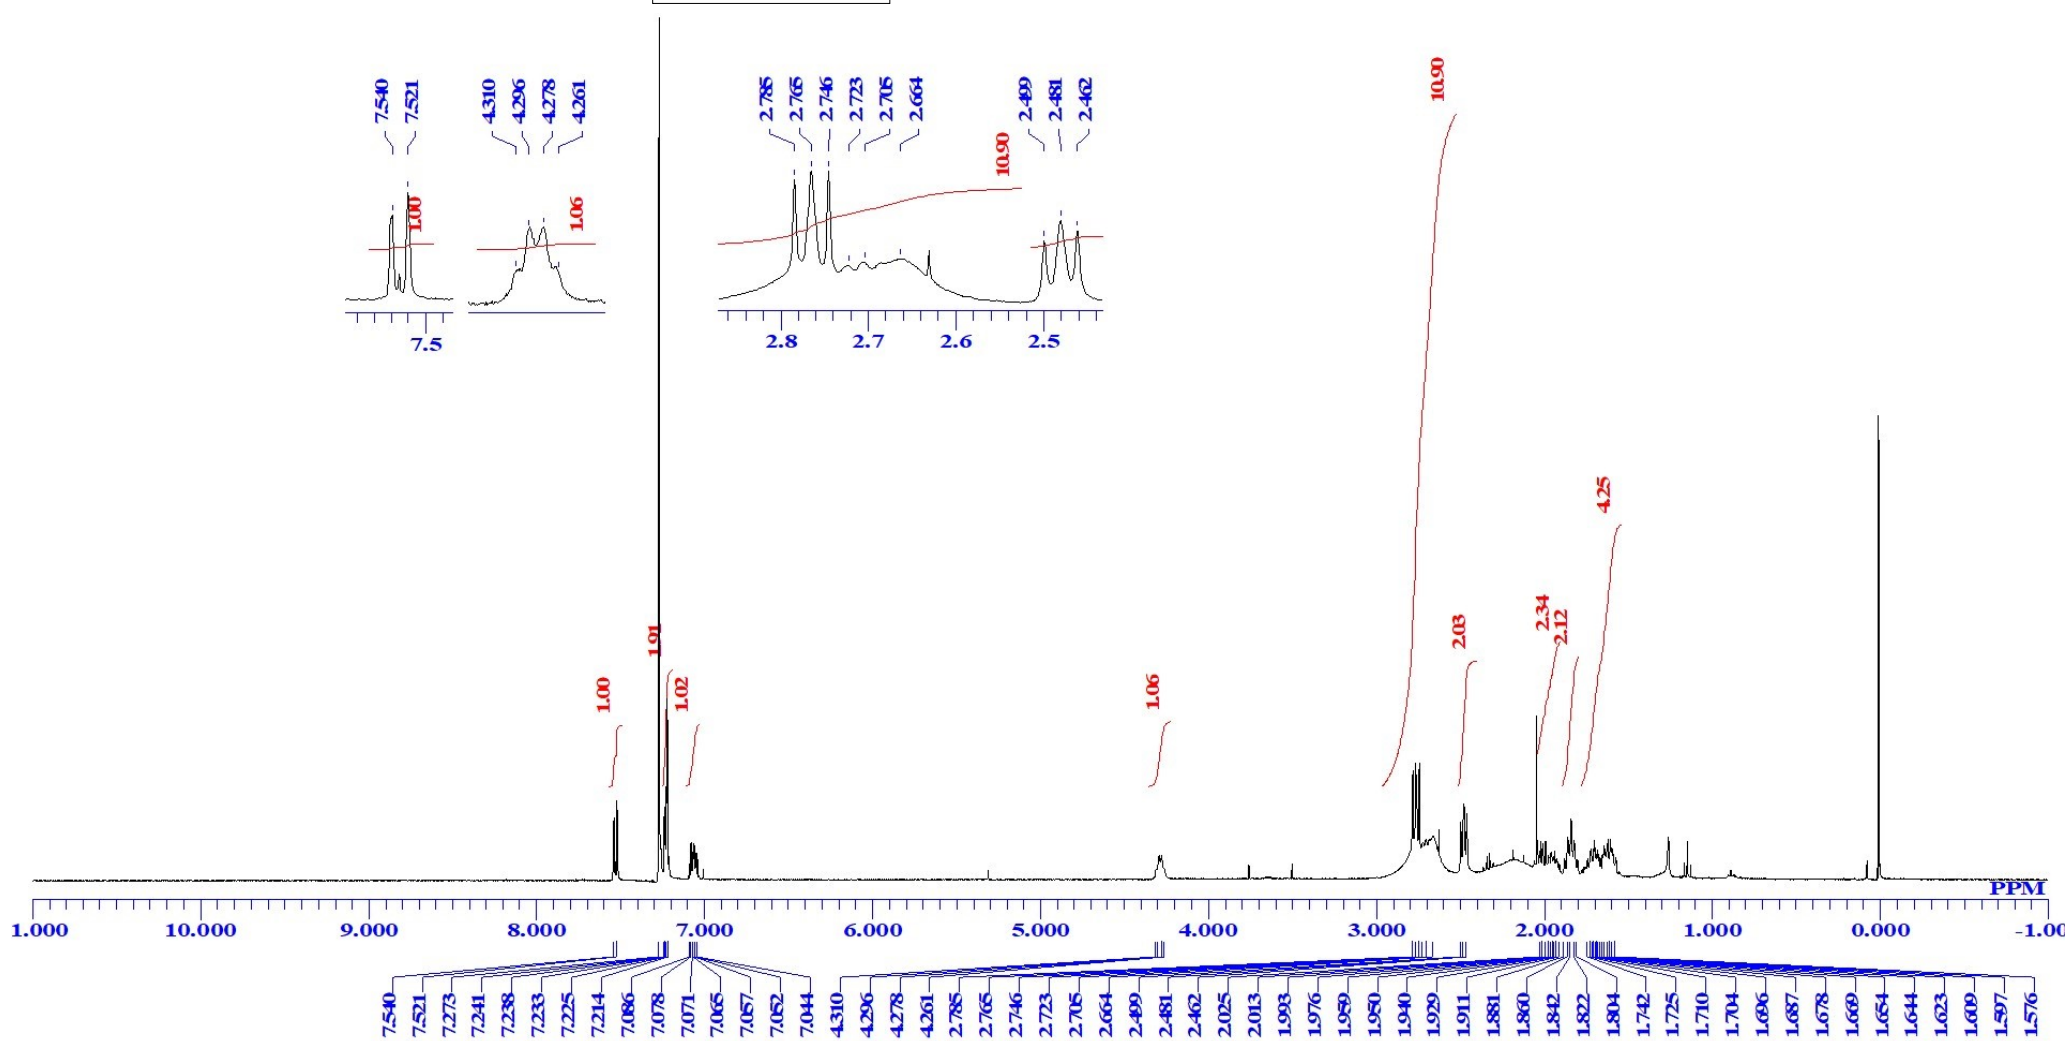

<sup>1</sup>H NMR Spectrum of **11** (400 MHz, CDCl<sub>3</sub>)

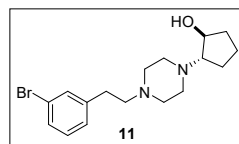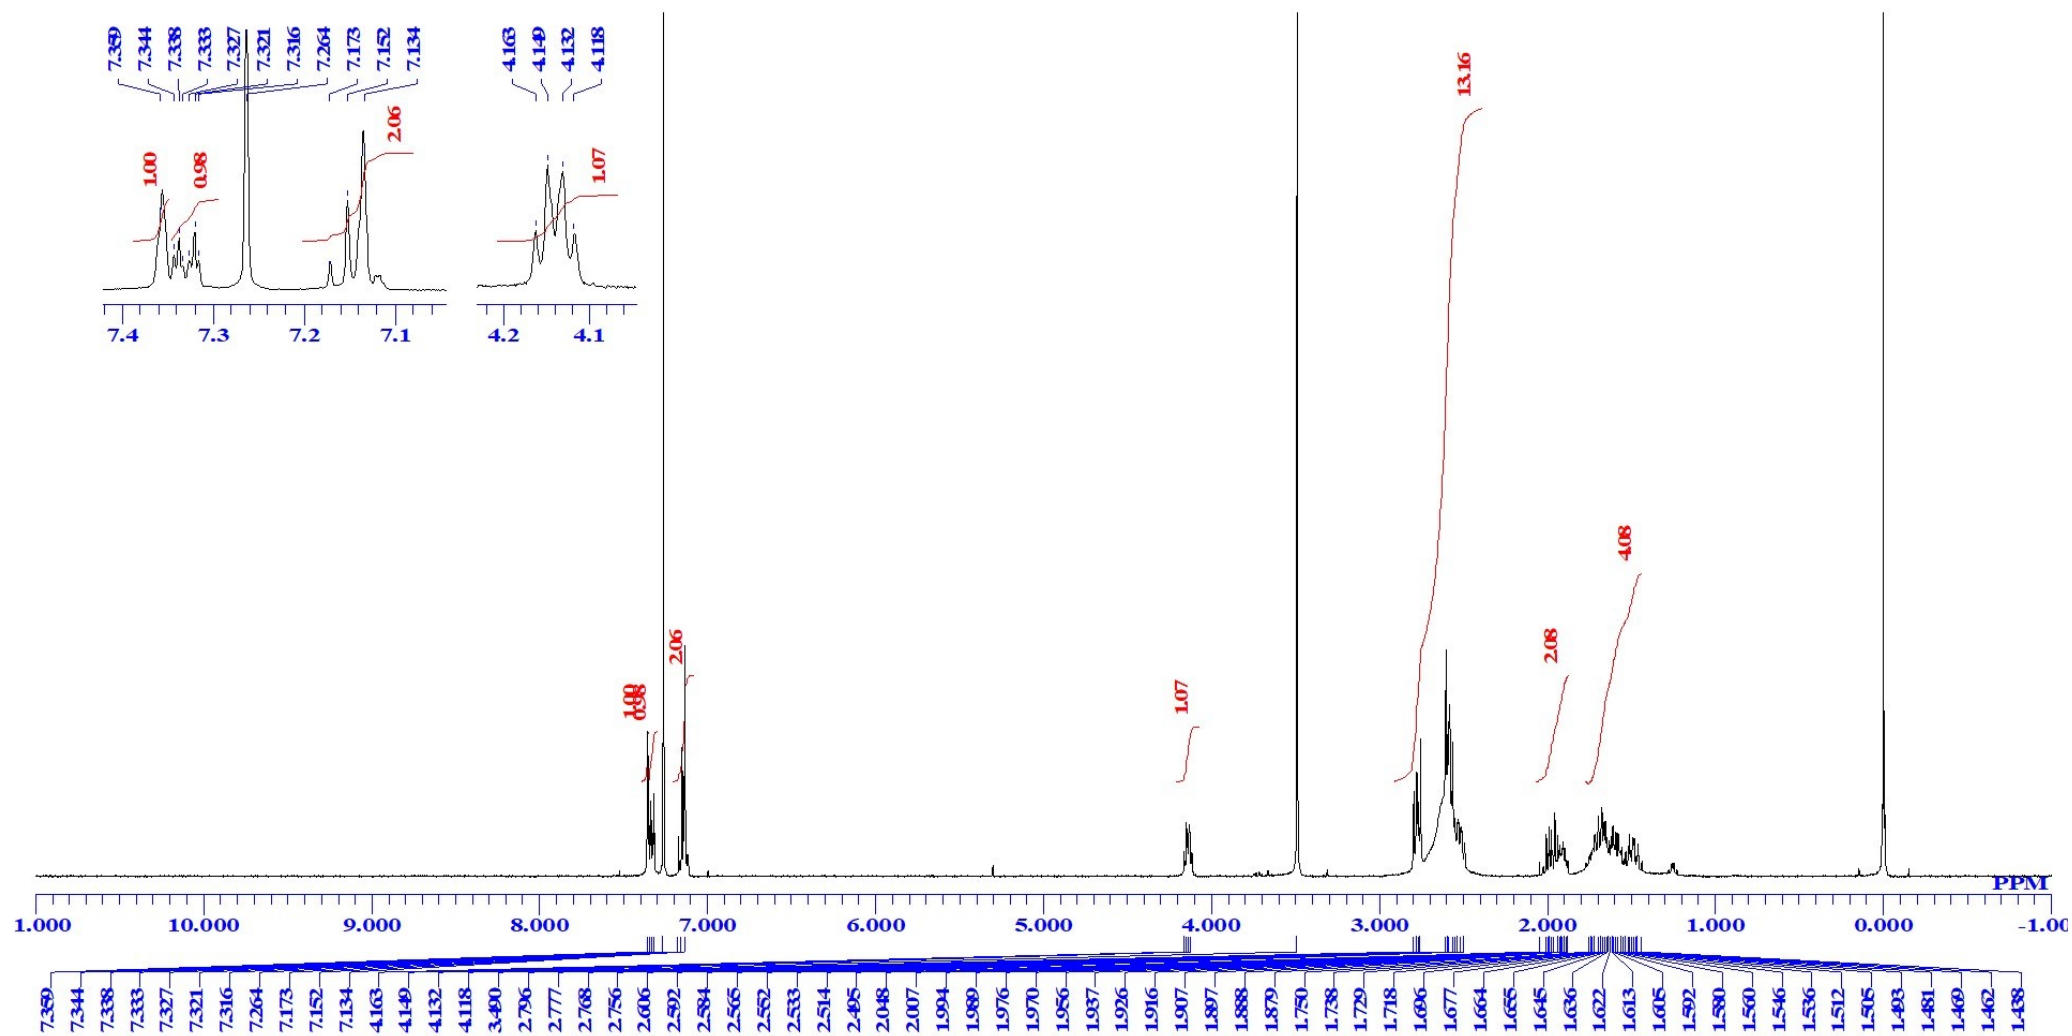

<sup>1</sup>H NMR Spectrum of **12** (400 MHz, CDCl<sub>3</sub>)

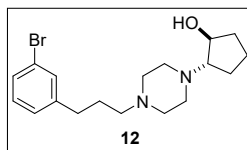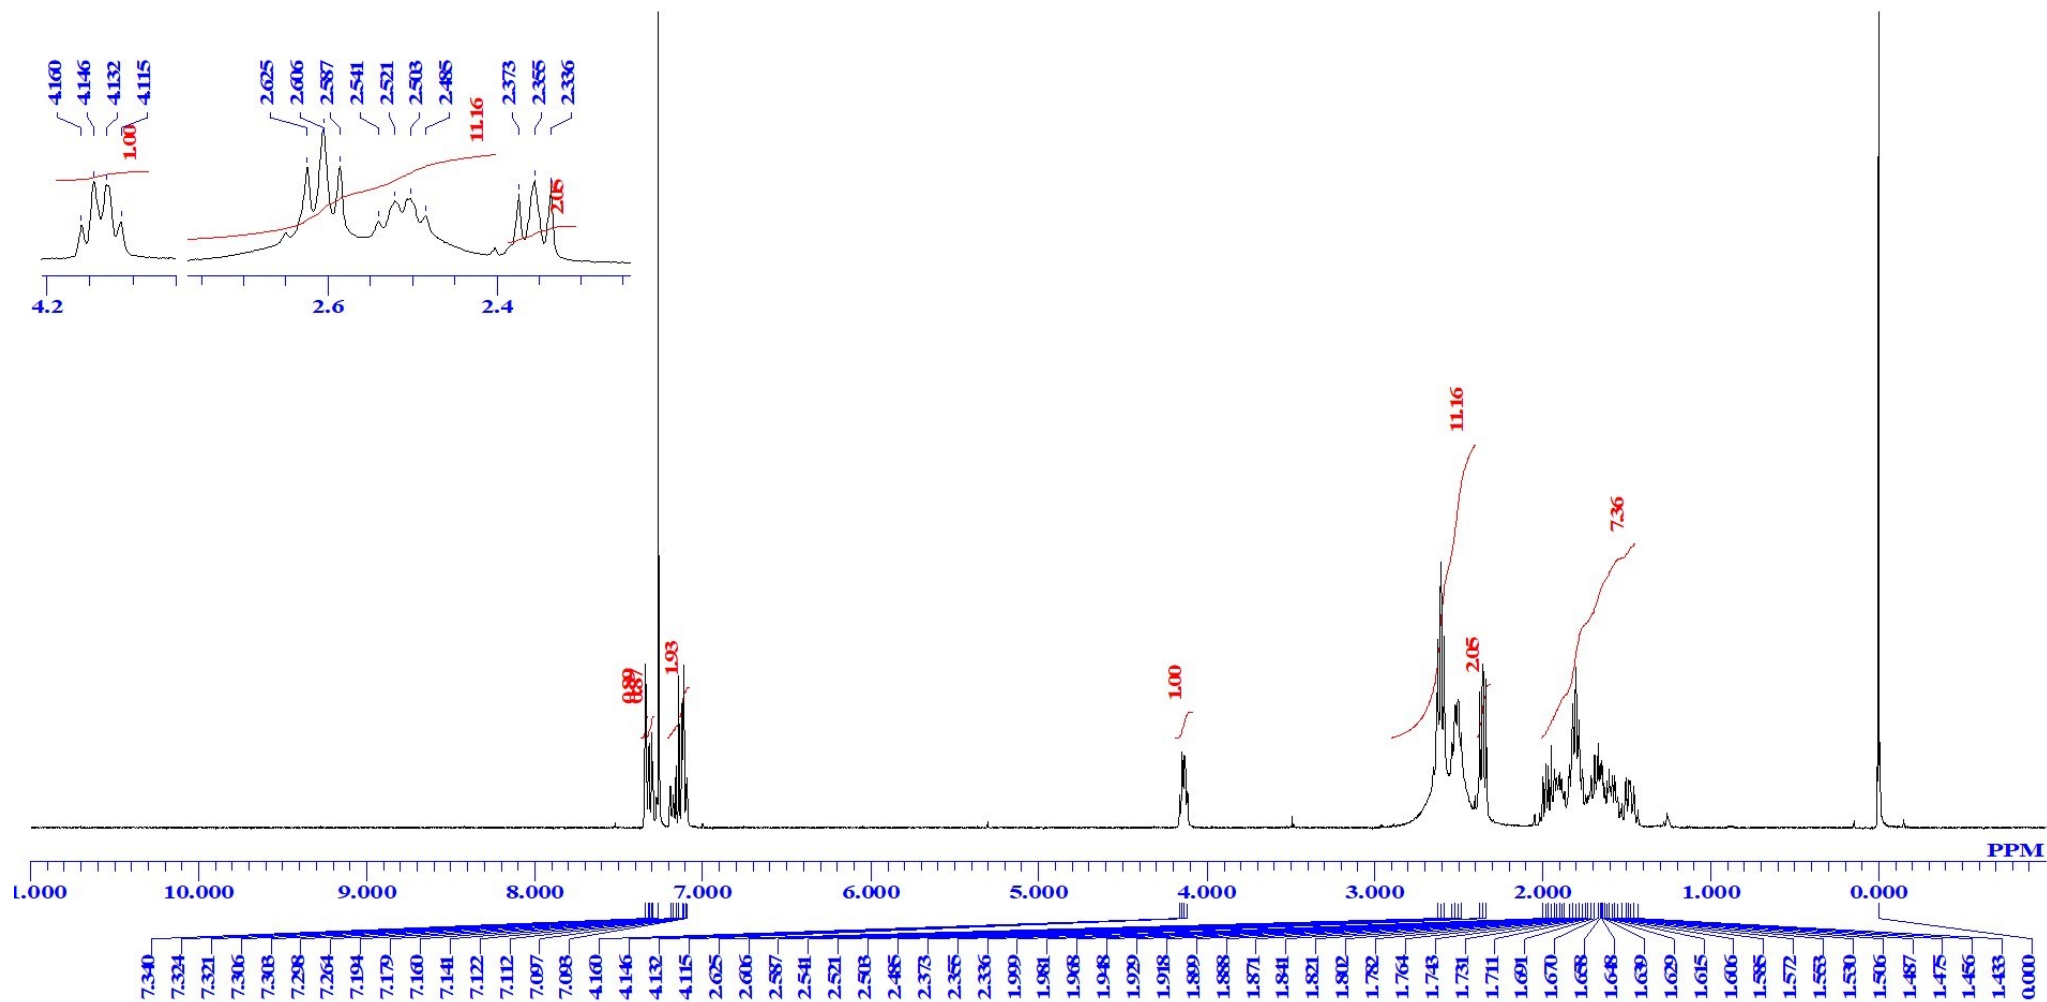

<sup>1</sup>H NMR Spectrum of **13** (600 MHz, CDCl<sub>3</sub>)

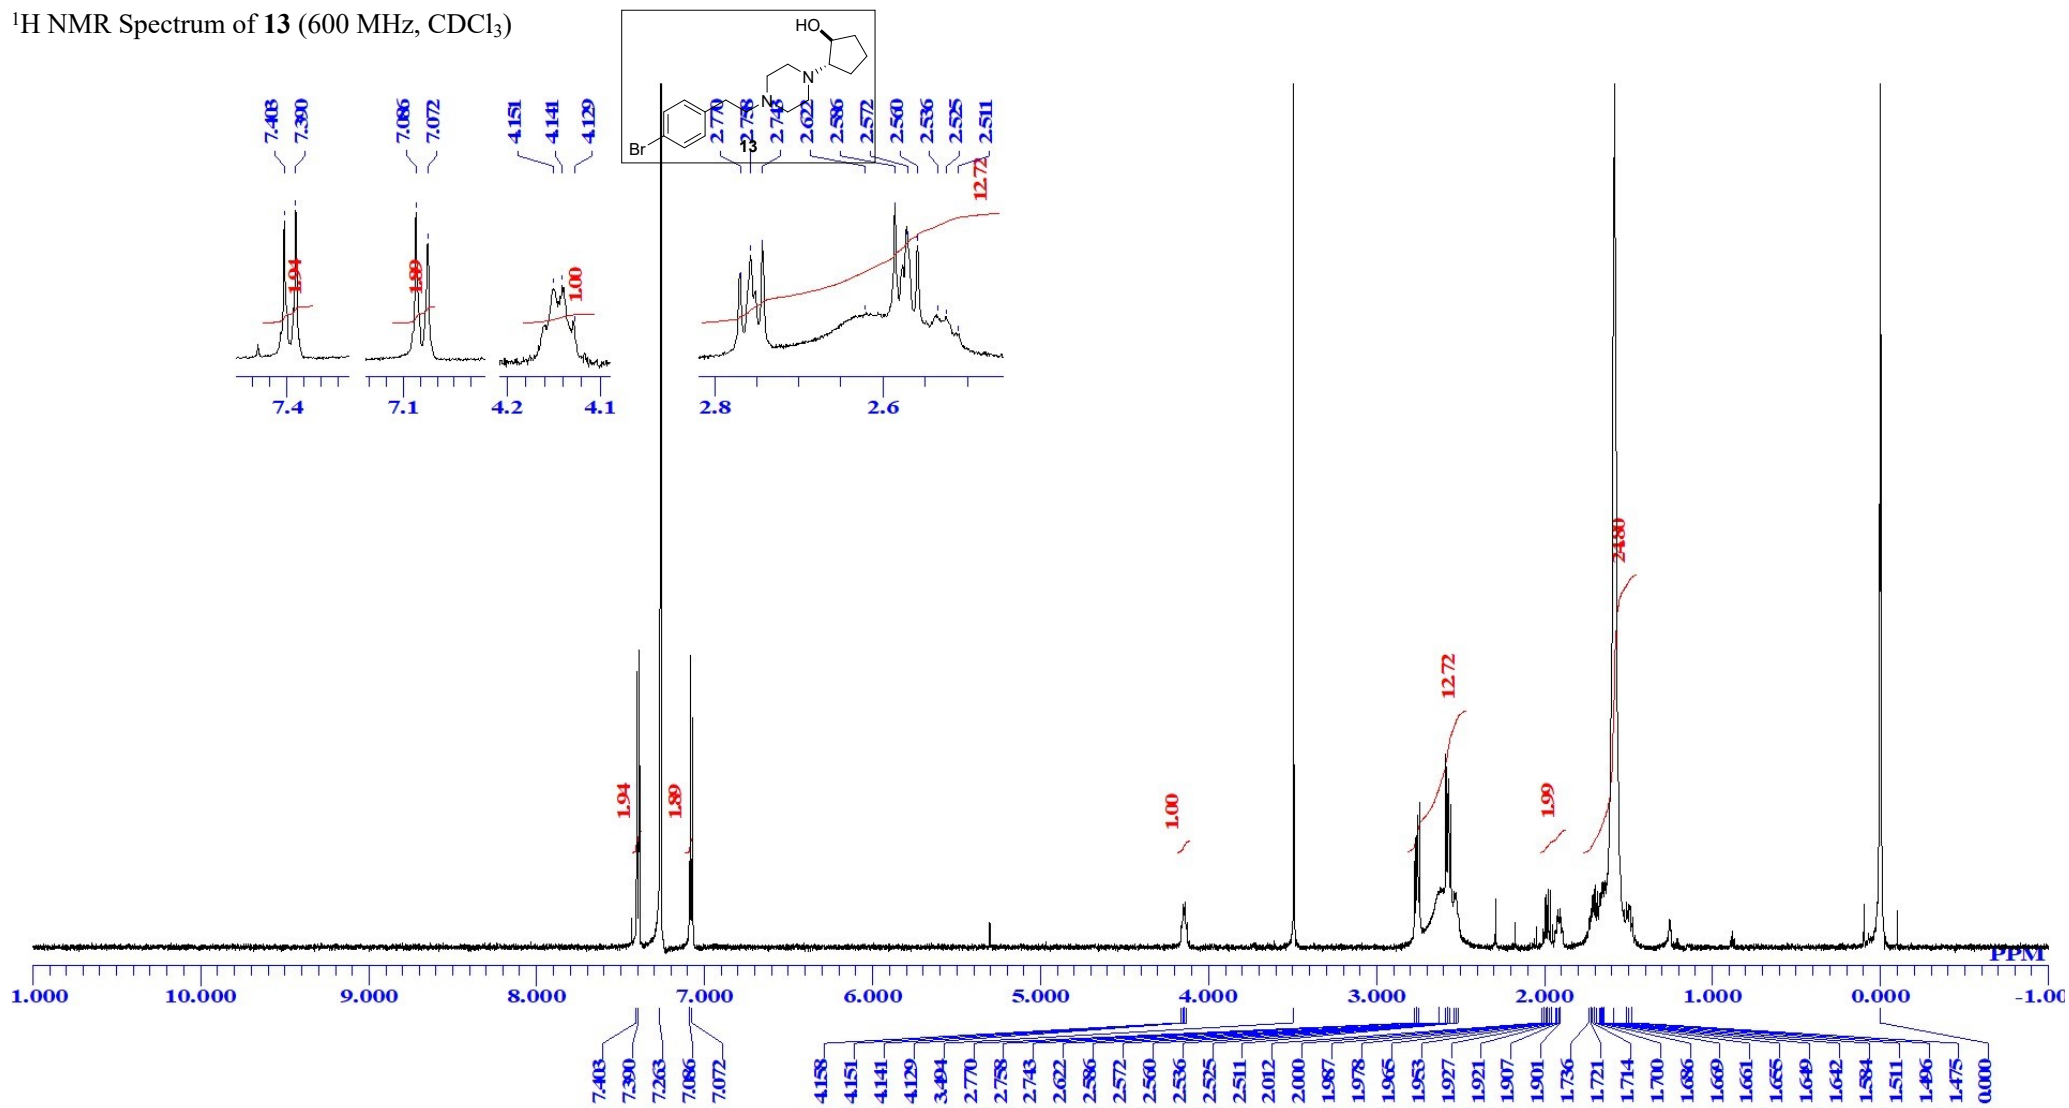

$^1\text{H}$  NMR Spectrum of **14** (600 MHz,  $\text{CDCl}_3$ )

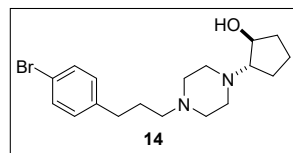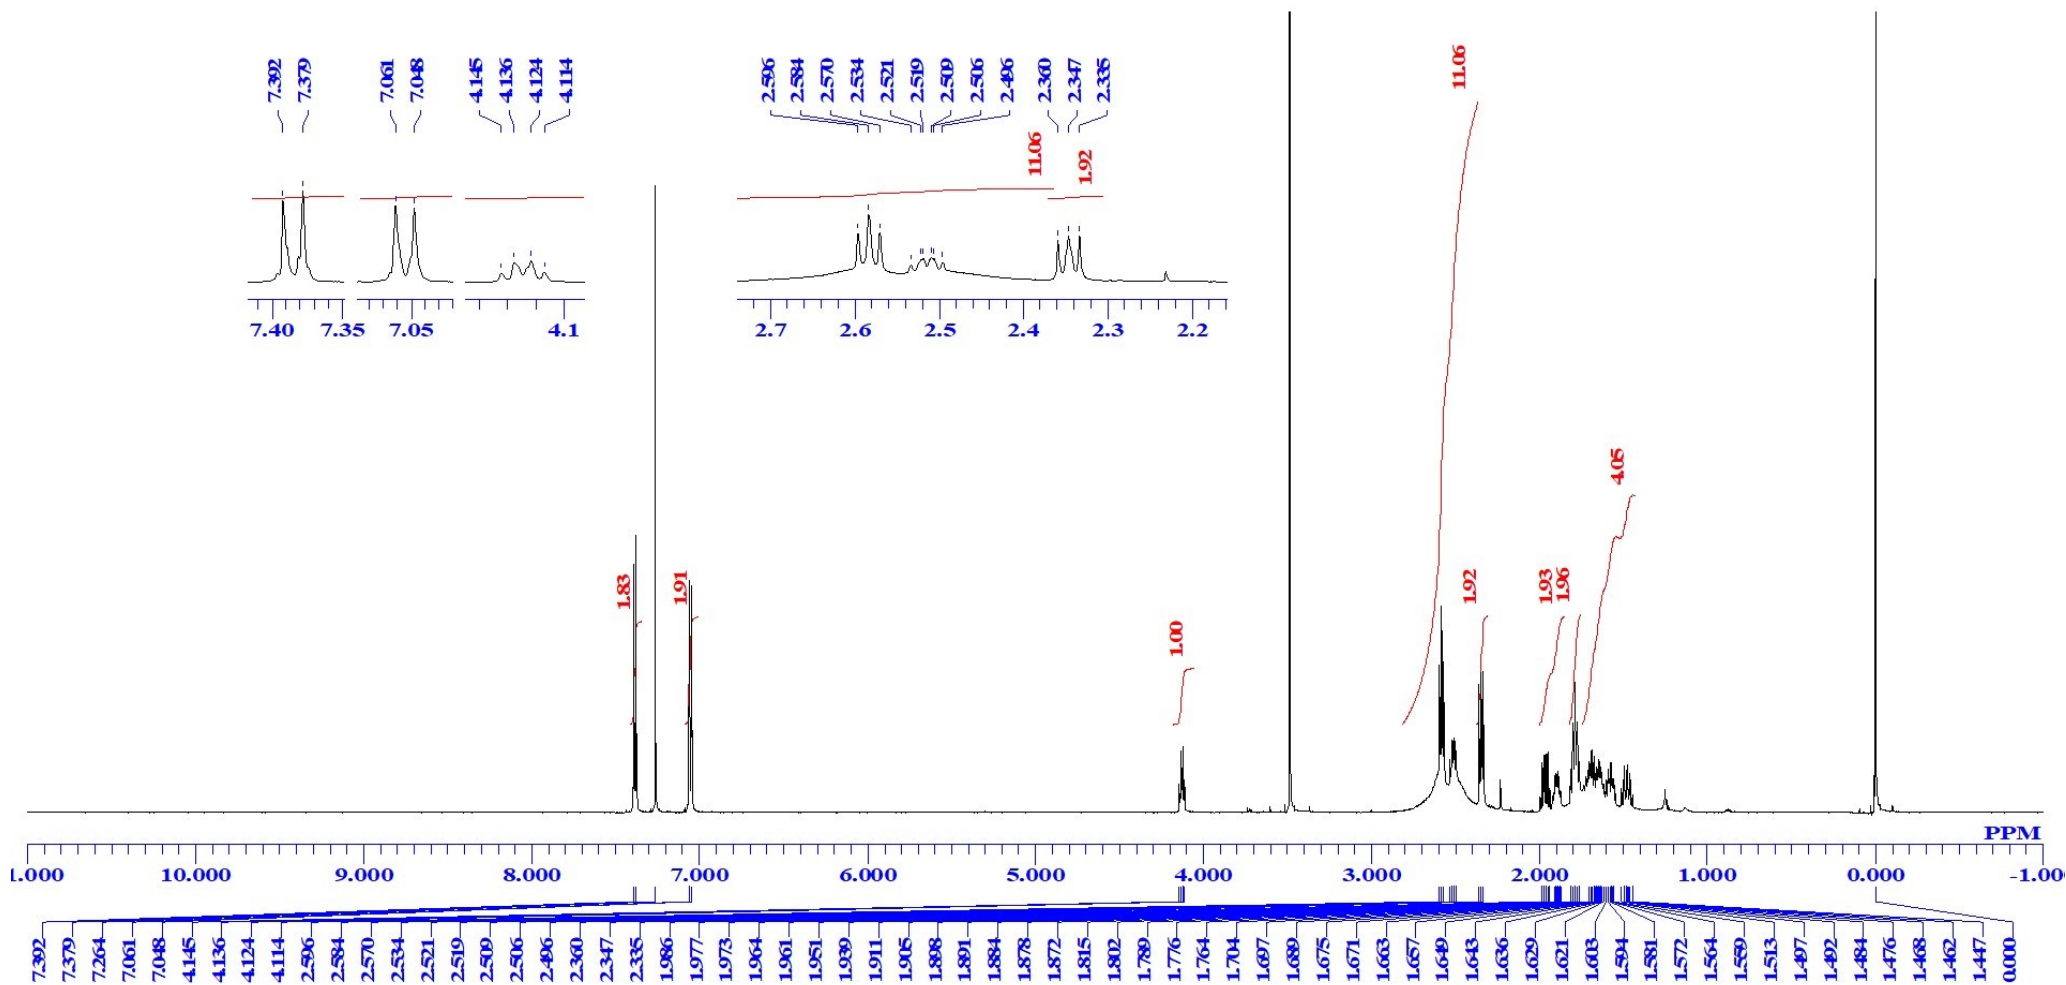

$^1\text{H}$  NMR Spectrum of **15** (600 MHz,  $\text{CDCl}_3$ )

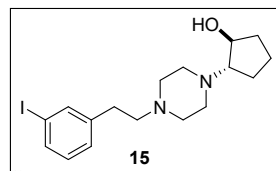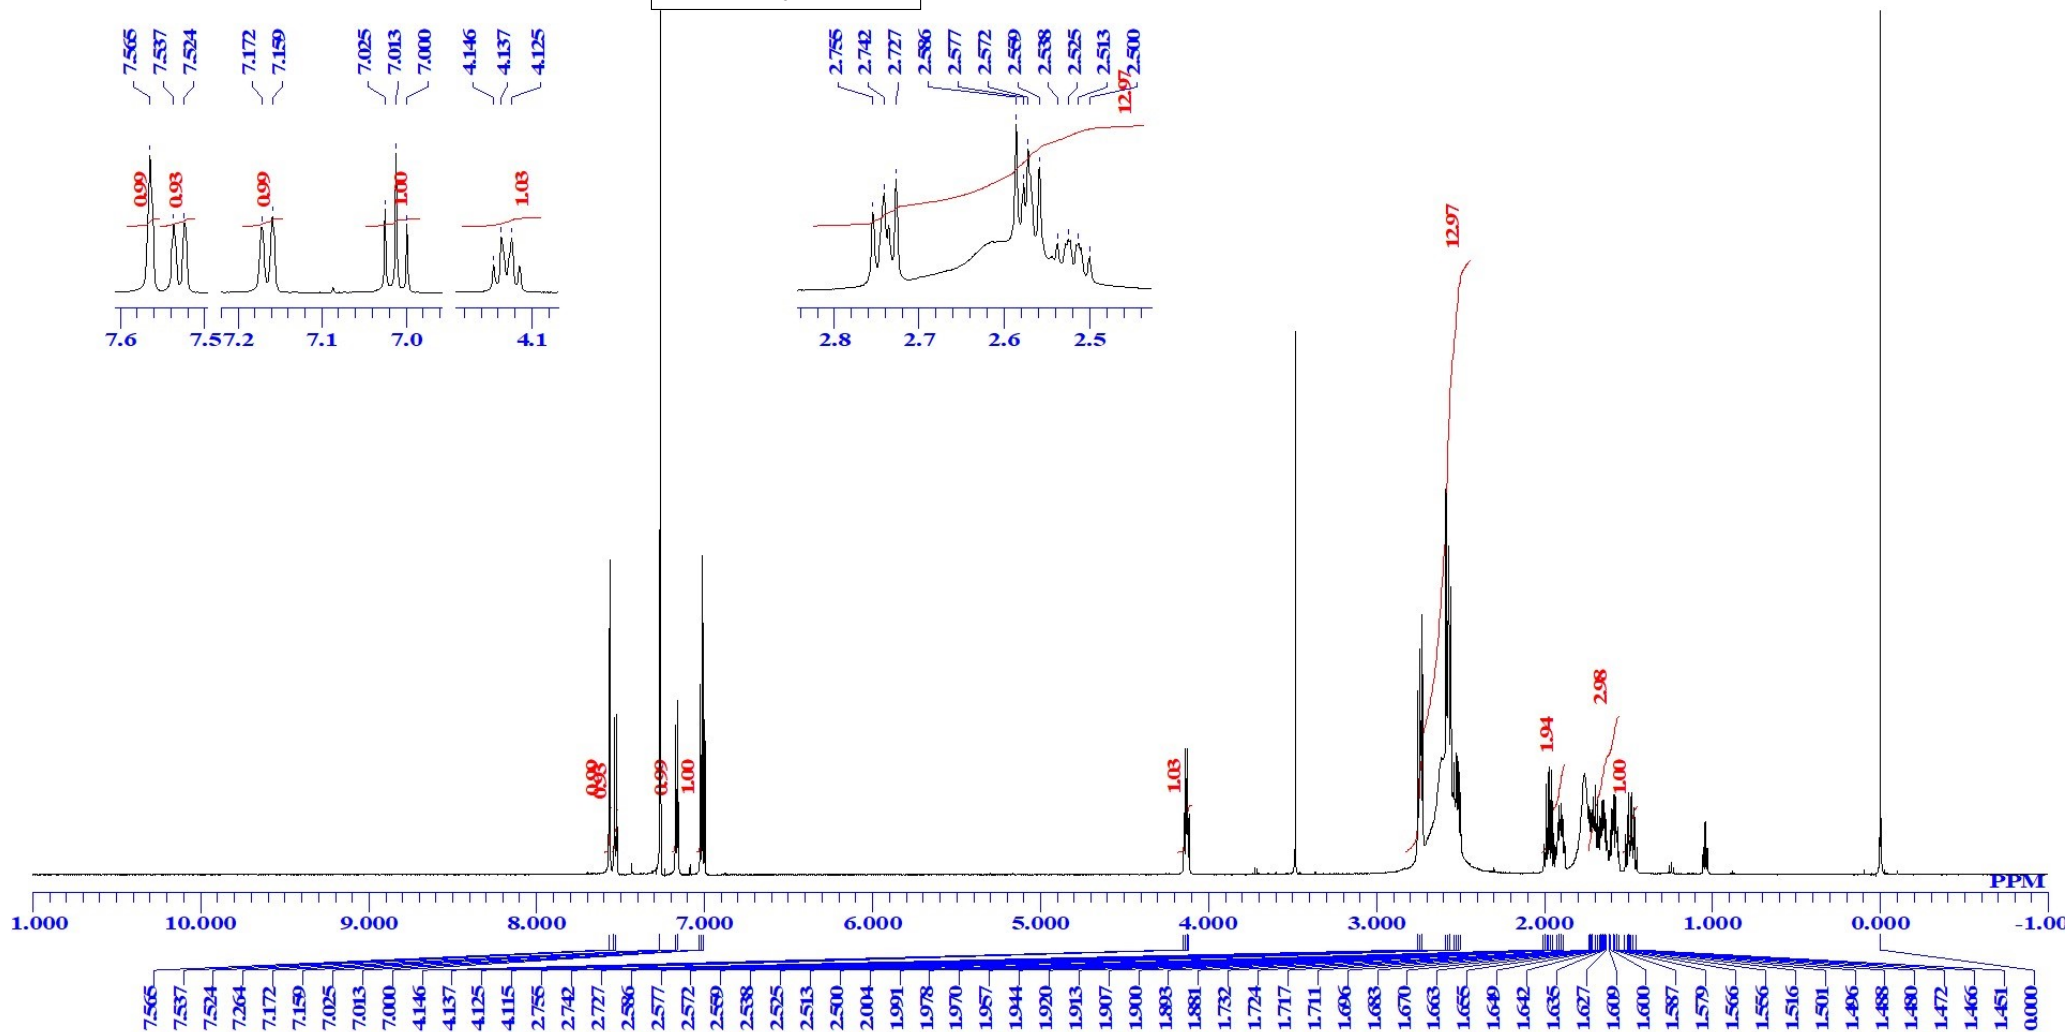

$^1\text{H}$  NMR Spectrum of **16** (400 MHz,  $\text{CDCl}_3$ )

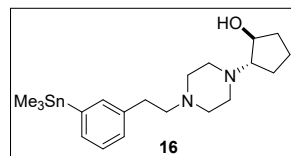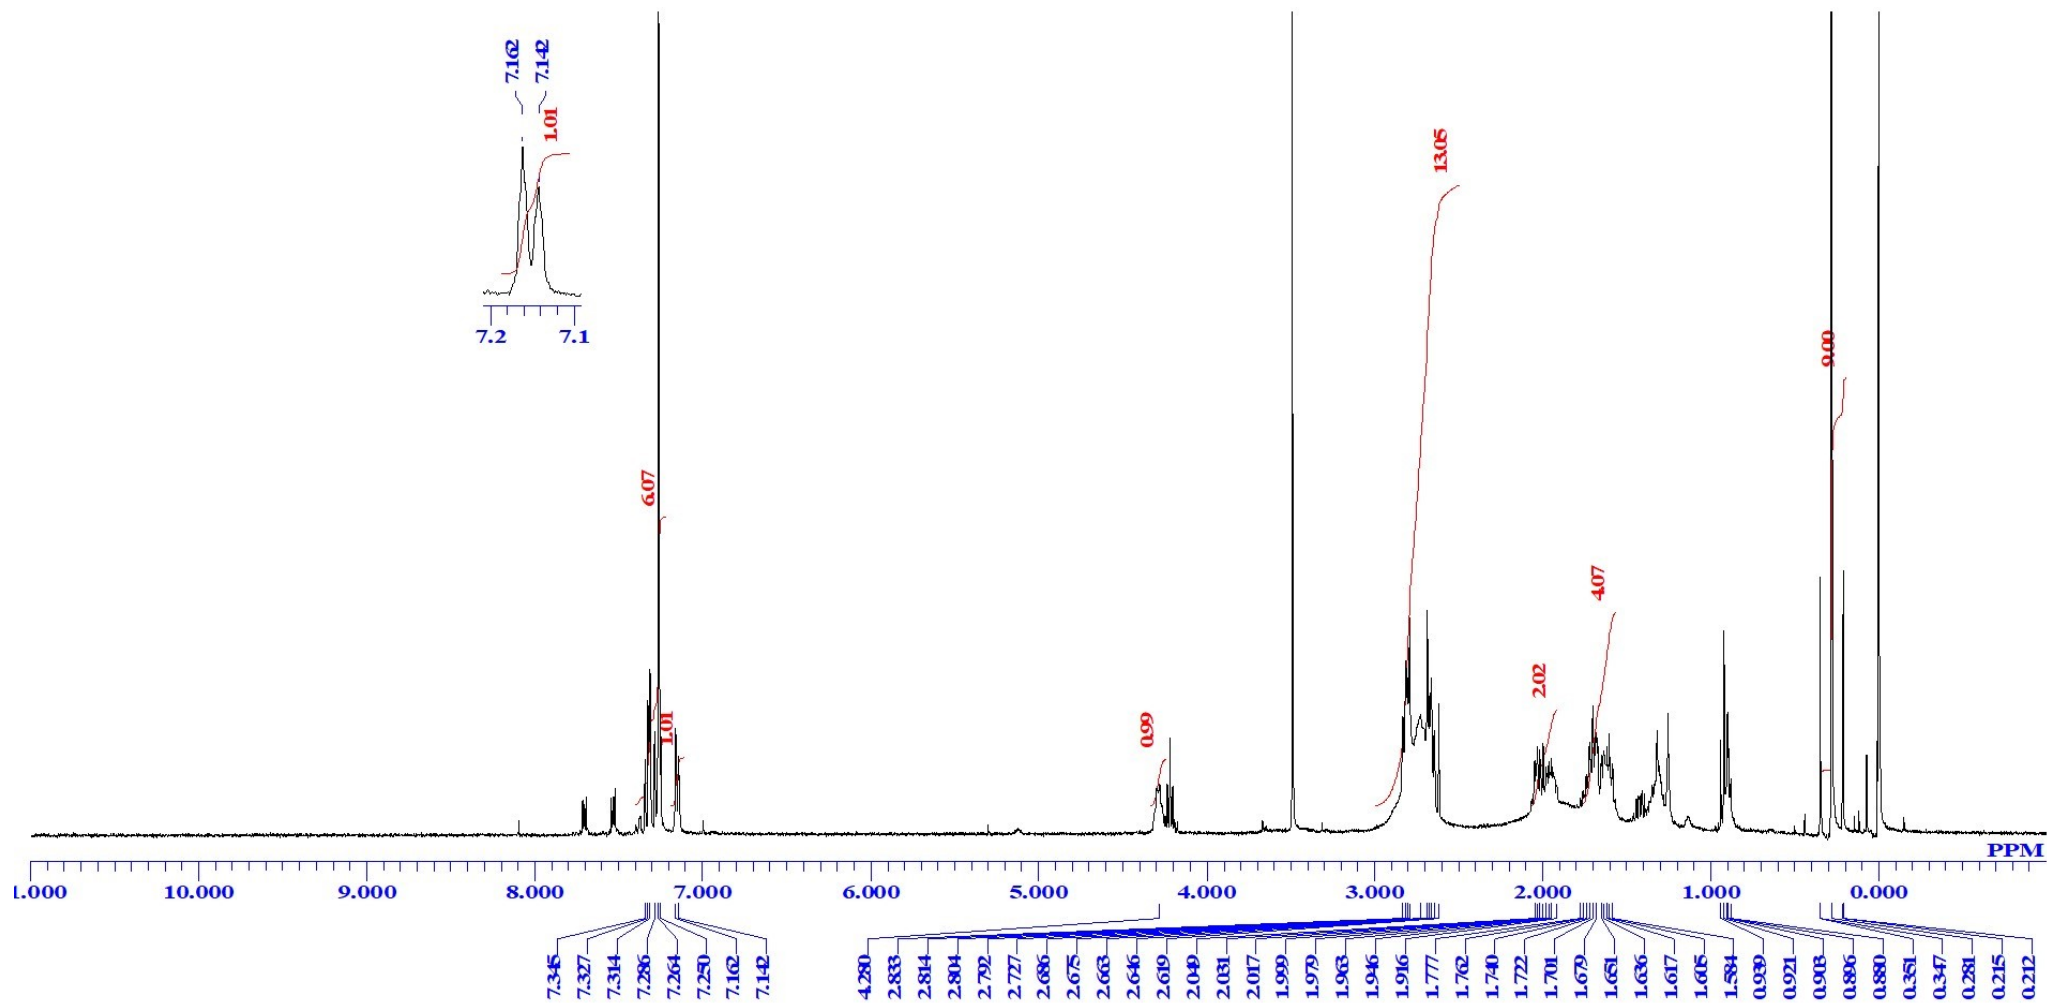

<sup>1</sup>H NMR Spectrum of 17 (600 MHz, CDCl<sub>3</sub>)

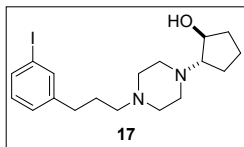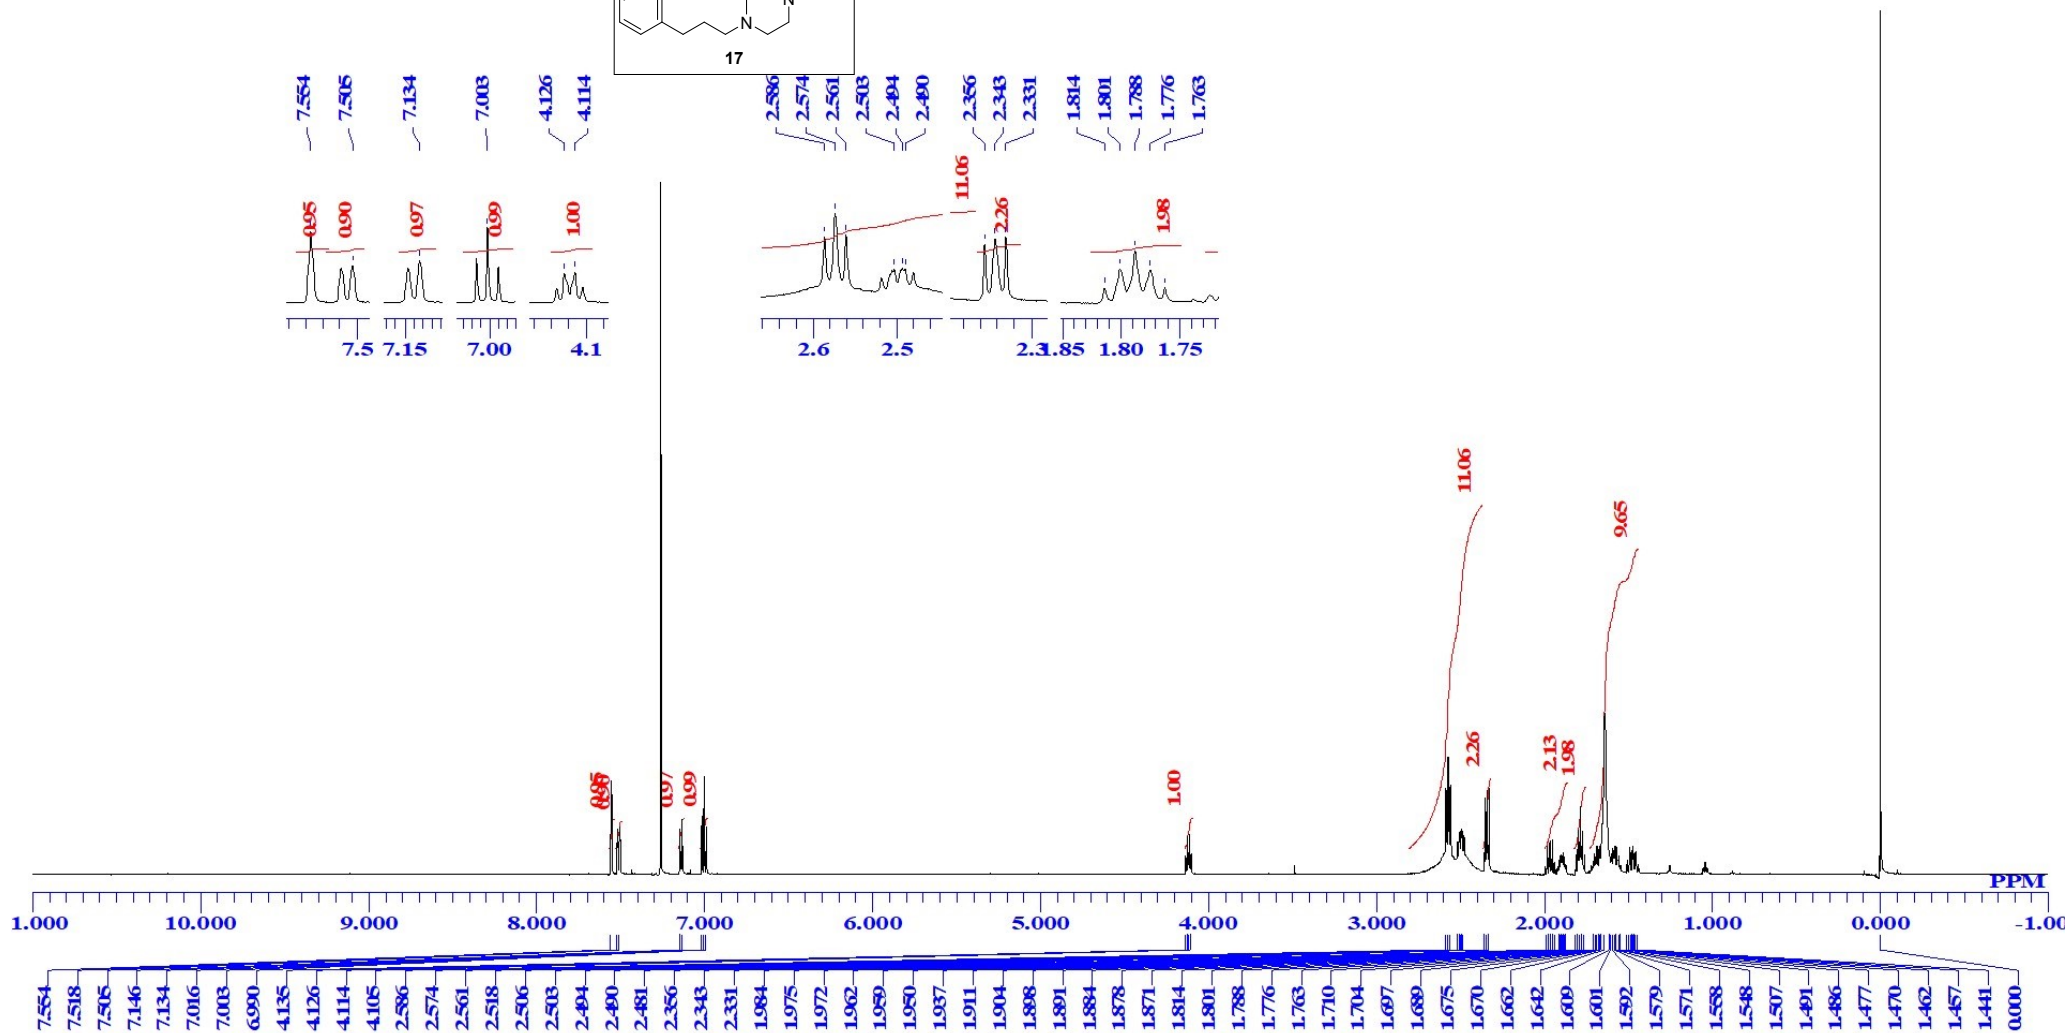



<sup>1</sup>H NMR Spectrum of **18** (400 MHz, CDCl<sub>3</sub>)

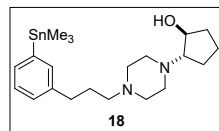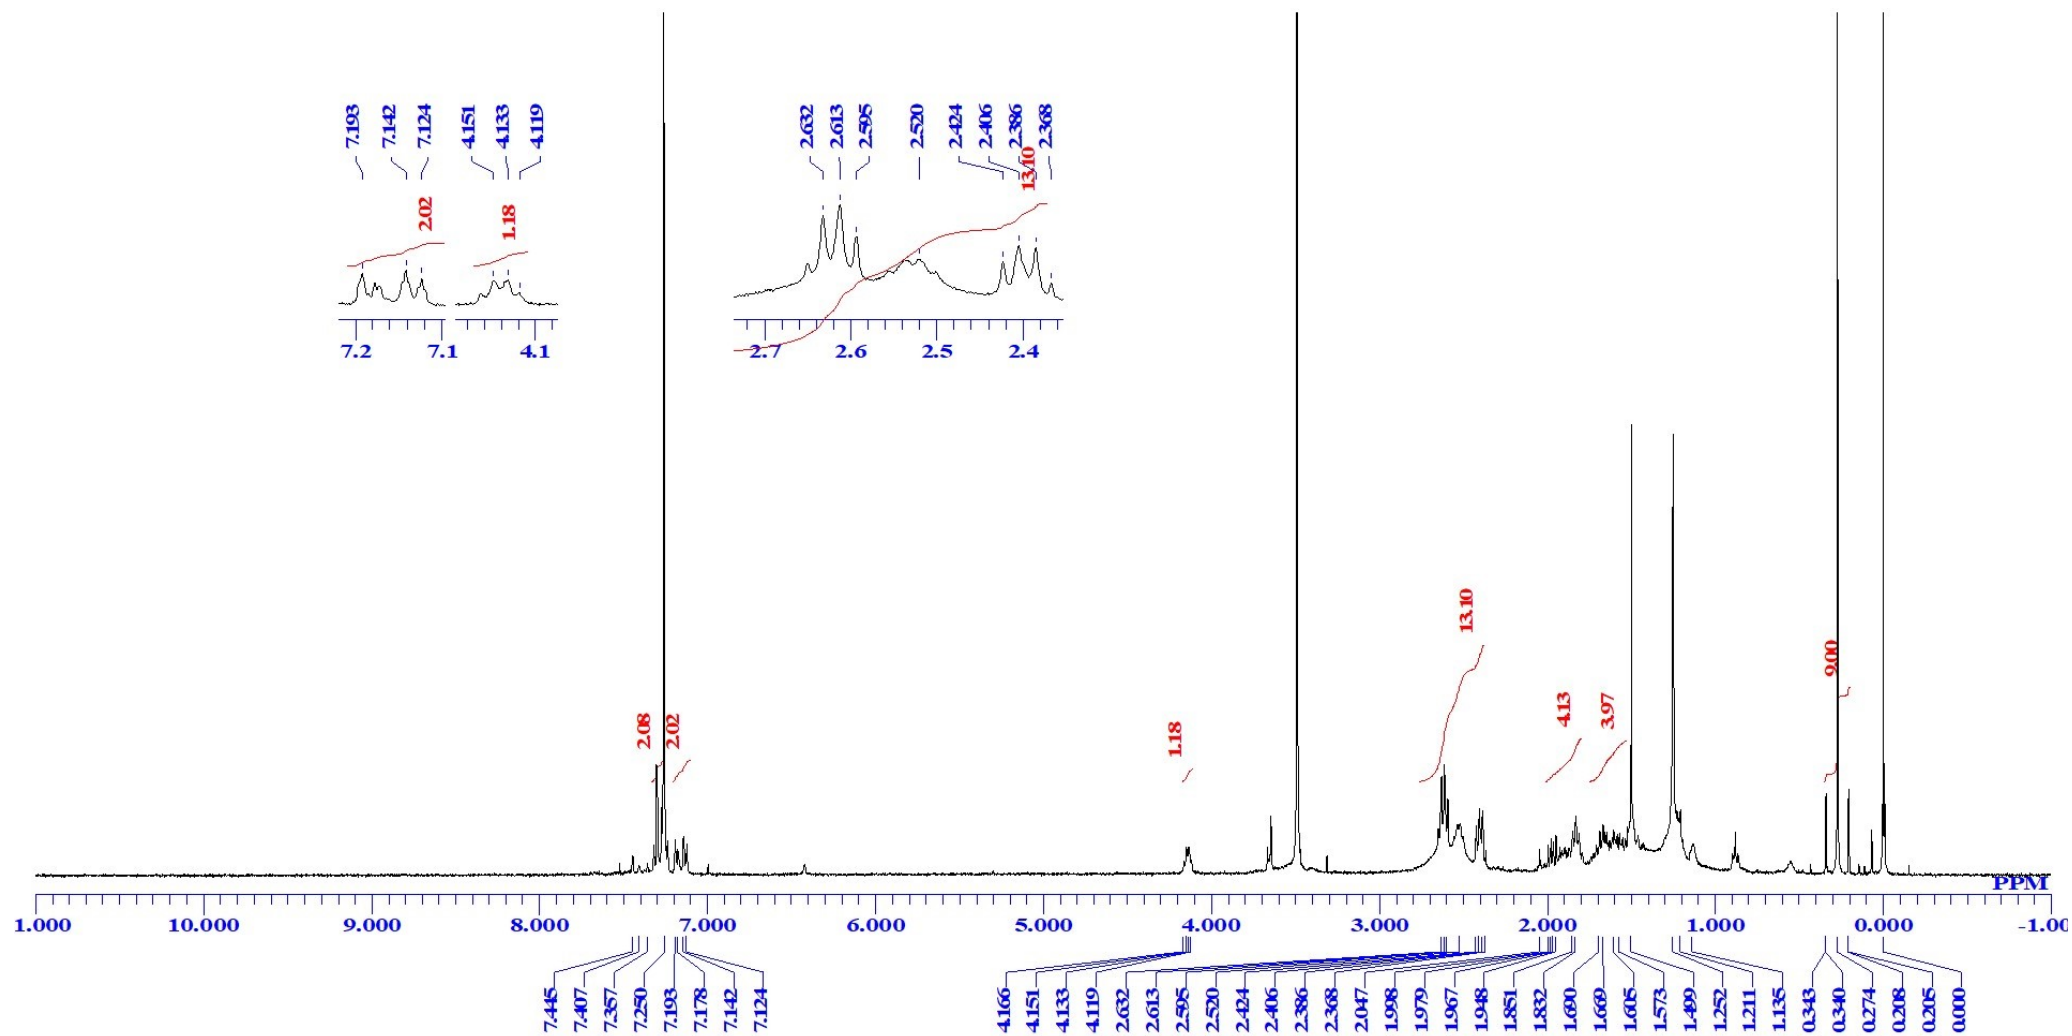

$^1\text{H}$  NMR Spectrum of **19** (400 MHz,  $\text{CDCl}_3$ )

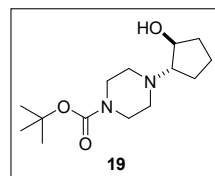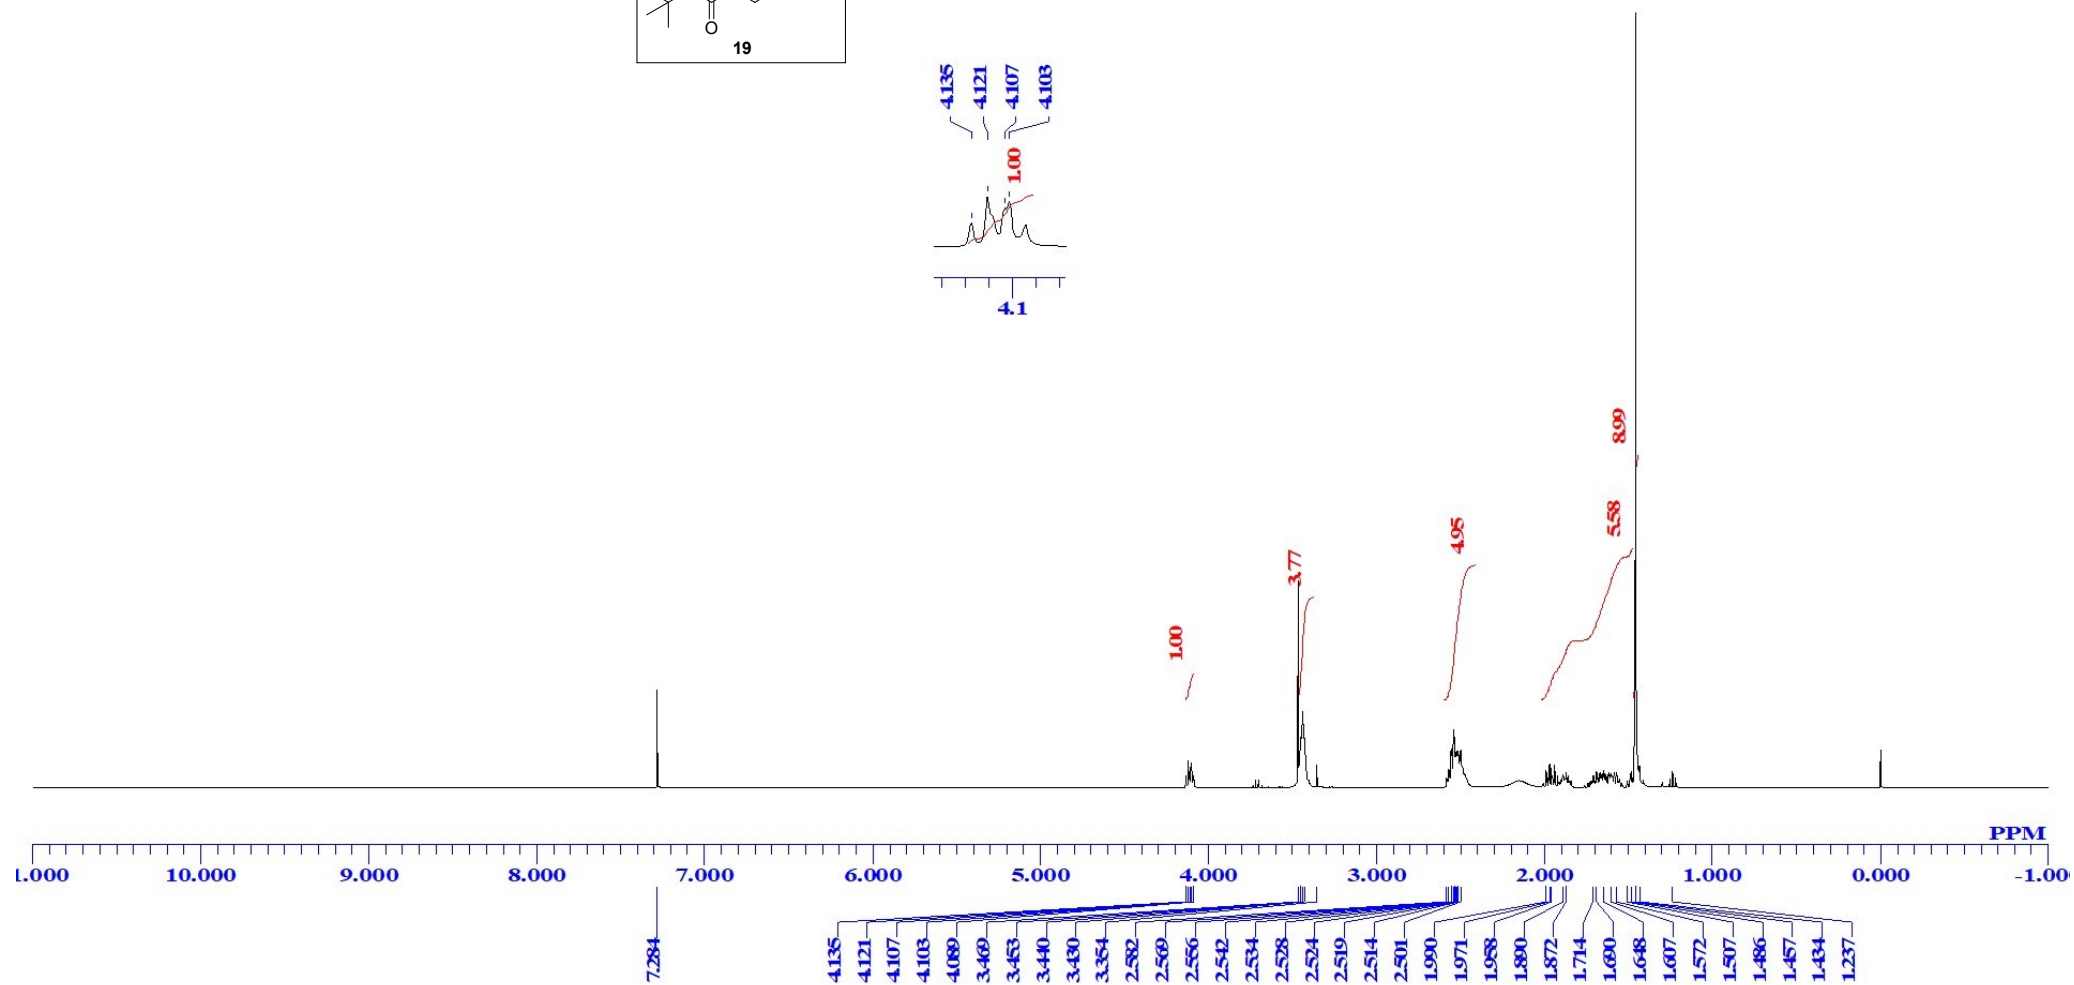

$^1\text{H}$  NMR Spectrum of **20** (400 MHz,  $\text{D}_2\text{O}$ )

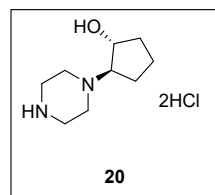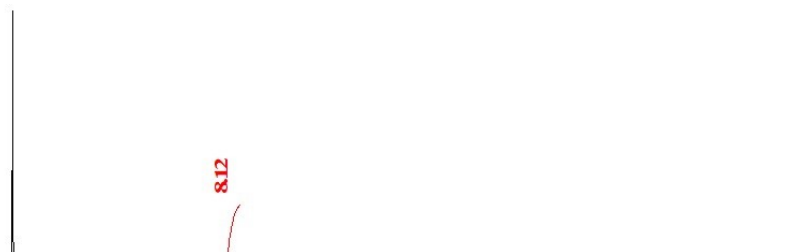

## 2. HPLC analysis

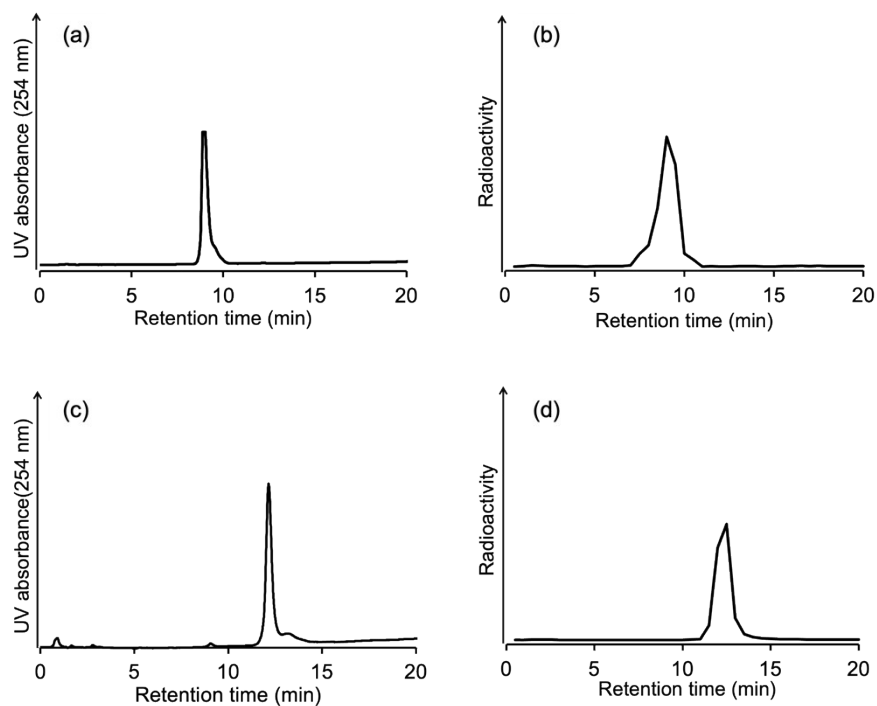

**Figure S1.** RP-HPLC chromatograms of (a) nonradioactive **15**, (b) [<sup>125</sup>I]**15**, (c) nonradioactive **17**, (d) [<sup>125</sup>I]**17**. Conditions: A flow rate of 1 mL/min with a gradient mobile phase of 60% methanol in water containing 0.05% TEA to 90% methanol in water containing 0.05% TEA for 20 min.

### 3. Detailed biodistribution data

**Table S1.** Biodistribution of radioactivity at 1 and 24 h after intravenous injection of [<sup>125</sup>I]**15** in DU145 tumor-bearing mice.

| Tissue               | Time after injection |             |
|----------------------|----------------------|-------------|
|                      | 1 h                  | 24 h        |
| Blood                | 0.69 ± 0.10          | 0.08 ± 0.02 |
| Tumor                | 5.39 ± 1.44          | 2.13 ± 0.18 |
| Liver                | 3.53 ± 0.10          | 0.50 ± 0.04 |
| Kidney               | 9.75 ± 0.75          | 1.13 ± 0.16 |
| Small Intestine      | 10.40 ± 1.42         | 1.29 ± 0.21 |
| Large Intestine      | 2.97 ± 0.45          | 0.88 ± 0.12 |
| Spleen               | 6.80 ± 0.91          | 0.91 ± 0.15 |
| Pancreas             | 14.43 ± 0.42         | 3.58 ± 0.95 |
| Lung                 | 6.15 ± 1.48          | 0.50 ± 0.10 |
| Heart                | 2.96 ± 0.41          | 0.18 ± 0.04 |
| Stomach <sup>†</sup> | 1.32 ± 0.23          | 0.26 ± 0.05 |
| Bone                 | 2.00 ± 0.25          | 0.36 ± 0.19 |
| Brain                | 3.47 ± 0.13          | 0.38 ± 0.04 |
| Muscle               | 0.93 ± 0.13          | 0.17 ± 0.07 |

Data are expressed as % injected dose per gram tissue. Each value represents the mean ± SD for four animals.

<sup>†</sup>Data are expressed as % injected dose.

**Table S2.** Biodistribution of radioactivity at 1 and 24 h after intravenous injection of [<sup>125</sup>I]**17** in DU145 tumor-bearing mice.

| Tissue               | Time after injection |              |
|----------------------|----------------------|--------------|
|                      | 1 h                  | 24 h         |
| Blood                | 0.85 ± 0.05          | 0.08 ± 0.02  |
| Tumor                | 4.79 ± 0.77          | 4.08 ± 0.91  |
| Liver                | 7.45 ± 0.35          | 0.62 ± 0.10  |
| Kidney               | 14.34 ± 0.83         | 1.35 ± 0.27  |
| Small Intestine      | 14.57 ± 0.41         | 1.00 ± 0.17  |
| Large Intestine      | 3.73 ± 0.64          | 1.17 ± 0.35  |
| Spleen               | 11.69 ± 0.75         | 1.50 ± 0.15  |
| Pancreas             | 31.41 ± 2.26         | 11.63 ± 2.85 |
| Lung                 | 15.07 ± 2.44         | 1.80 ± 0.80  |
| Heart                | 4.08 ± 0.28          | 0.31 ± 0.06  |
| Stomach <sup>†</sup> | 1.49 ± 0.19          | 0.23 ± 0.07  |
| Bone                 | 3.18 ± 0.86          | 0.45 ± 0.10  |
| Brain                | 5.73 ± 0.47          | 0.52 ± 0.22  |
| Muscle               | 1.63 ± 0.35          | 0.37 ± 0.19  |

Data are expressed as % injected dose per gram tissue. Each value represents the mean ± SD for four animals.

<sup>†</sup>Data are expressed as % injected dose.

**Table S3.** Biodistribution of radioactivity at 1 and 24 h after intravenous injection of [<sup>125</sup>I]2 in DU145 tumor-bearing mice.

| Tissue               | Time after injection |             |
|----------------------|----------------------|-------------|
|                      | 1 h                  | 24 h        |
| Blood                | 0.78 ± 0.09          | 0.20 ± 0.03 |
| Tumor                | 6.23 ± 0.55          | 6.27 ± 2.36 |
| Liver                | 26.02 ± 1.99         | 7.42 ± 0.48 |
| Kidney               | 26.15 ± 2.08         | 3.41 ± 0.58 |
| Small Intestine      | 12.19 ± 0.70         | 3.00 ± 0.63 |
| Large Intestine      | 4.11 ± 0.38          | 2.02 ± 0.31 |
| Spleen               | 14.87 ± 0.99         | 2.15 ± 0.31 |
| Lung                 | 18.00 ± 3.18         | 1.89 ± 0.51 |
| Heart                | 3.66 ± 0.32          | 0.40 ± 0.08 |
| Stomach <sup>†</sup> | 1.73 ± 0.41          | 0.52 ± 0.33 |
| Brain                | 4.77 ± 0.60          | 0.66 ± 0.13 |
| Muscle               | 1.84 ± 0.36          | 0.26 ± 0.09 |

Data are expressed as % injected dose per gram tissue. Each value represents the mean ± SD for four animals.

<sup>†</sup>Data are expressed as % injected dose.

This biodistribution data from a reference.<sup>1</sup>

**Table S4.** Biodistribution of radioactivity at 10 min, 30 min, 1 h, 4 h, 8 h, and 24 h after intravenous injection of [<sup>125</sup>I]**15** in normal mice.

| Tissue               | Time after injection |              |              |              |             |             |
|----------------------|----------------------|--------------|--------------|--------------|-------------|-------------|
|                      | 10 min               | 30 min       | 1 h          | 4 h          | 8 h         | 24 h        |
| Blood                | 0.85 ± 0.03          | 0.65 ± 0.06  | 0.58 ± 0.09  | 0.58 ± 0.10  | 0.40 ± 0.01 | 0.07 ± 0.01 |
| Liver                | 4.74 ± 0.36          | 4.09 ± 0.82  | 4.21 ± 0.81  | 3.40 ± 0.47  | 3.97 ± 0.36 | 0.39 ± 0.04 |
| Kidney               | 18.01 ± 1.32         | 13.43 ± 1.02 | 13.38 ± 2.15 | 8.66 ± 1.30  | 9.18 ± 0.95 | 0.97 ± 0.25 |
| S-Intestine          | 5.19 ± 0.29          | 7.56 ± 2.20  | 9.35 ± 1.55  | 6.62 ± 0.79  | 4.98 ± 0.36 | 0.65 ± 0.16 |
| L-Intestine          | 2.30 ± 0.14          | 2.35 ± 0.25  | 2.60 ± 0.47  | 9.64 ± 2.32  | 6.58 ± 0.89 | 0.75 ± 0.07 |
| Spleen               | 7.65 ± 1.40          | 7.15 ± 0.77  | 6.86 ± 1.04  | 3.11 ± 1.16  | 2.57 ± 0.59 | 0.58 ± 0.08 |
| Pancreas             | 13.47 ± 2.30         | 13.35 ± 1.51 | 16.02 ± 1.84 | 12.70 ± 1.23 | 8.05 ± 1.26 | 2.28 ± 0.55 |
| Lung                 | 14.44 ± 4.55         | 12.63 ± 2.05 | 9.82 ± 1.51  | 4.49 ± 0.68  | 5.69 ± 1.27 | 0.61 ± 0.09 |
| Heart                | 4.94 ± 0.57          | 3.81 ± 0.30  | 3.16 ± 0.40  | 1.68 ± 0.15  | 0.92 ± 0.04 | 0.17 ± 0.02 |
| Stomach <sup>†</sup> | 3.55 ± 0.19          | 3.45 ± 0.46  | 3.78 ± 0.67  | 2.94 ± 0.97  | 2.65 ± 0.88 | 0.52 ± 0.09 |
| Bone                 | 2.85 ± 0.33          | 2.60 ± 0.16  | 2.76 ± 0.22  | 1.56 ± 0.34  | 1.13 ± 0.07 | 0.38 ± 0.09 |
| Brain                | 4.89 ± 0.34          | 4.28 ± 0.27  | 3.89 ± 0.37  | 2.18 ± 0.11  | 1.24 ± 0.02 | 0.43 ± 0.04 |
| Muscle               | 2.38 ± 0.33          | 2.01 ± 0.24  | 1.93 ± 0.12  | 1.23 ± 0.19  | 0.79 ± 0.08 | 0.14 ± 0.02 |
| Neck <sup>†</sup>    | 0.19 ± 0.03          | 0.31 ± 0.07  | 0.63 ± 0.11  | 1.78 ± 0.50  | 3.01 ± 0.49 | 4.23 ± 0.62 |

Data are expressed as % injected dose per gram tissue. Each value represents the mean ± SD for four animals.

S-Intestine and L-Intestine mean small intestine and large intestine, respectively.

<sup>†</sup>Data are expressed as % injected dose.

**Table S5.** Biodistribution of radioactivity at 10 min, 30 min, 1 h, 4 h, 8 h, and 24 h after intravenous injection of [<sup>125</sup>I]17 in normal mice.

| Tissue               | Time after injection |              |              |              |              |              |
|----------------------|----------------------|--------------|--------------|--------------|--------------|--------------|
|                      | 10 min               | 30 min       | 1 h          | 4 h          | 8 h          | 24 h         |
| Blood                | 0.66 ± 0.08          | 0.56 ± 0.08  | 0.40 ± 0.04  | 0.44 ± 0.06  | 0.42 ± 0.14  | 0.14 ± 0.02  |
| Liver                | 5.96 ± 1.70          | 6.24 ± 1.03  | 5.23 ± 1.11  | 4.90 ± 0.86  | 3.16 ± 0.40  | 1.10 ± 0.20  |
| Kidney               | 16.58 ± 2.94         | 12.31 ± 0.92 | 10.28 ± 0.88 | 6.94 ± 0.09  | 4.27 ± 0.49  | 1.26 ± 0.30  |
| S-Intestine          | 5.17 ± 1.48          | 7.02 ± 1.17  | 7.66 ± 0.77  | 6.49 ± 0.27  | 2.99 ± 0.37  | 1.10 ± 0.17  |
| L-Intestine          | 2.28 ± 0.65          | 2.02 ± 0.13  | 2.01 ± 0.38  | 8.43 ± 0.93  | 5.80 ± 0.52  | 1.73 ± 0.16  |
| Spleen               | 7.89 ± 2.45          | 7.75 ± 1.75  | 6.14 ± 0.85  | 5.10 ± 0.36  | 3.03 ± 0.36  | 0.91 ± 0.12  |
| Pancreas             | 12.65 ± 4.20         | 12.50 ± 0.34 | 12.37 ± 2.38 | 15.37 ± 3.24 | 18.37 ± 0.55 | 11.42 ± 2.08 |
| Lung                 | 18.66 ± 2.57         | 12.02 ± 1.57 | 8.93 ± 0.64  | 4.28 ± 0.97  | 2.67 ± 0.51  | 0.71 ± 0.15  |
| Heart                | 4.72 ± 0.53          | 3.44 ± 0.41  | 2.66 ± 0.28  | 1.58 ± 0.10  | 0.91 ± 0.07  | 0.21 ± 0.04  |
| Stomach <sup>†</sup> | 2.90 ± 0.83          | 2.89 ± 0.91  | 2.71 ± 0.95  | 2.74 ± 0.81  | 2.70 ± 0.76  | 1.31 ± 0.30  |
| Bone                 | 2.77 ± 0.53          | 2.38 ± 0.42  | 2.39 ± 0.18  | 1.98 ± 0.24  | 1.52 ± 0.11  | 0.48 ± 0.07  |
| Brain                | 5.58 ± 0.68          | 4.69 ± 0.45  | 4.29 ± 0.63  | 3.41 ± 0.28  | 2.28 ± 0.17  | 0.61 ± 0.06  |
| Muscle               | 2.69 ± 0.43          | 2.05 ± 0.12  | 1.76 ± 0.22  | 1.30 ± 0.12  | 0.82 ± 0.09  | 0.20 ± 0.02  |
| Neck <sup>†</sup>    | 0.19 ± 0.05          | 0.27 ± 0.05  | 0.37 ± 0.03  | 1.30 ± 0.11  | 2.67 ± 0.26  | 3.78 ± 0.53  |

Data are expressed as % injected dose per gram tissue. Each value represents the mean ± SD for four animals.

S-Intestine and L-Intestine mean small intestine and large intestine, respectively.

<sup>†</sup>Data are expressed as % injected dose.



## Reference

- (1) Ogawa, K.; Masuda, R.; Mishiro, K.; Wang, M.; Kozaka, T.; Shiba, K.; Kinuya, S.; Odani, A. Syntheses and evaluation of a homologous series of aza-vesamicol as improved radioiodine-labeled probes for sigma-1 receptor imaging. *Bioorg. Med. Chem.* **2019**, *27* (10), 1990-1996.
